# Supplementary material for: Odd–even effect controls twist-elasticity of an organic fluorophore in cocrystals prepared using mechanochemistry
Source: Royal Society of Chemistry journal article supplement (doi:10.1039/d5tc00313j), 2025-01-01
Supplement: d5tc00313j1.pdf [file d5tc00313j1.pdf]

## Electronic Supporting Information File

### **Odd-Even Effect Controls Twist-Elasticity of an Organic Fluorophore in Cocrystals Prepared Using Mechanochemistry**

Nabadeep Kalita,<sup>a</sup> Poonam Deka,<sup>a</sup> Ishita Ghosh,<sup>b</sup> Kalyan J. Kalita,<sup>b</sup> Ashish Gogoi,<sup>a</sup> C. Malla Reddy\*,<sup>c</sup> and Ranjit Thakuria\*,<sup>a</sup>

<sup>a</sup> Department of Chemistry, Gauhati University, Guwahati 781014, Assam, India. E-mail: ranjit.thakuria@gmail.com, ranjit.thakuria@gauhati.ac.in

<sup>b</sup> Department of Chemical Sciences, Indian Institute of Science Education and Research Kolkata, 741246, West Bengal, India.

<sup>c</sup> Department of Chemistry, Indian Institute of Technology Hyderabad, Telangana 502285, India.

## Table of Content

|                                                                              |          |
|------------------------------------------------------------------------------|----------|
| 1. Experimental Section                                                      | Page S2  |
| 2. Instrumental Details                                                      | Page S4  |
| 3. PXRD analysis                                                             | Page S6  |
| 4. Thermal analysis                                                          | Page S7  |
| 5. Phase purity analysis                                                     | Page S9  |
| 6. Polymorph screening of all the <b>PDAN-1</b> dicarboxylic acid cocrystals | Page S15 |
| 7. Crystallographic parameters of <b>PDAN-1</b> and cocrystals/salts         | Page S20 |
| 8. Photo-physical property of synthesized cocrystals/salts                   | Page S23 |
| 9. Photoluminescence (PL) decay study                                        | Page S28 |
| 10. Aggregation Induced Titration                                            | Page S29 |
| 11. DSC thermograms of <b>PDAN-1</b> multicomponent solids                   | Page S34 |
| 12. Nanomechanical analysis                                                  | Page S38 |

## 1. Experimental Section

### Materials

3-pyridineacetonitrile, biphenyl-4-carboxaldehyde and piperidine were purchased from Sigma-Aldrich and used without further purification. All the aliphatic dicarboxylic acids were purchased from local suppliers and used without further purification.

### Cocrystal Synthesis:

Liquid-assisted grinding (LAG) in presence of catalytic amount of acetonitrile as liquid is used to prepare cocrystals of **PDAN-1** with aliphatic dicarboxylic acids varying chain lengths from oxalic acid (**C<sub>2</sub>**) to sebacic acid (**C<sub>10</sub>**) along with two unsaturated diacids viz. maleic acid (**MEA**) and fumaric acid (**FA**). All the co-crystallization experiments resulted in the formation of 2:1 cocrystals except with OA and MEA, which resulted in the formation of 1:1 molecular salts based on SCXRD and PXRD analysis. Details of the synthetic procedure are given below.

#### **PDAN-1•OA salt Cocrystal**

**PDAN-1P** (28.2 mg, 0.1 mmol) and **oxalic acid** (12.6 mg, 0.1 mmol) in 1:1 stoichiometry were ground in a mortar pestle in presence of catalytic amount (100  $\mu$ L) of acetonitrile solvent for about 15 minutes. The solution crystallization of the ground material in a mixture of chloroform, acetonitrile and methanol (3:1:1) solvent afforded block shaped single crystals of the product.

#### **PDAN-1•MA Cocrystal**

**PDAN-1P** (56.4 mg, 0.2 mmol) and **malonic acid** (10.4 mg, 0.1 mmol) in 2:1 stoichiometry were ground in a mortar pestle in presence of catalytic amount (100  $\mu$ L) of acetonitrile solvent for about 15 minutes. The solution crystallization of the ground material in a mixture of chloroform and acetonitrile (3:1) solvent afforded block shaped single crystals of the product.

#### **PDAN-1•SA Cocrystal**

**PDAN-1P** (56.4 mg, 0.2 mmol) and **succinic acid** (11.8 mg, 0.1 mmol) in 2:1 stoichiometry were ground in a mortar pestle in presence of catalytic amount (100  $\mu$ L) of acetonitrile solvent

for about 15 minutes. The solution crystallization of the ground material in a mixture of chloroform and acetonitrile (3:1) solvent afforded block shaped single crystals of the product.

#### **PDAN-1•GA Cocrystal**

**PDAN-1P** (56.4 mg, 0.2 mmol) and **glutaric acid** (13.2 mg, 0.1 mmol) in 2:1 stoichiometry were ground in a mortar pestle in presence of catalytic amount (100  $\mu$ L) of acetonitrile solvent for about 15 minutes. The solution crystallization of the ground material in a mixture of chloroform and acetonitrile (3:1) solvent afforded block shaped single crystals of the product.

#### **PDAN-1•AA Cocrystal**

**PDAN-1P** (56.4 mg, 0.2 mmol) and **adipic acid** (14.6 mg, 0.1 mmol) in 2:1 stoichiometry were ground in a mortar pestle in presence of catalytic amount (100  $\mu$ L) of acetonitrile solvent for about 15 minutes. The solution crystallization of the ground material in a mixture of chloroform and acetonitrile (3:1) solvent afforded block shaped single crystals of the product.

#### **PDAN-1•PMA Cocrystal**

**PDAN-1P** (56.4 mg, 0.2 mmol) and **pimelic acid** (16.0 mg, 0.1 mmol) in 2:1 stoichiometry were ground in a mortar pestle in presence of catalytic amount (100  $\mu$ L) of acetonitrile solvent for about 15 minutes. After several batches of solution crystallization, we were not able to generate suitable single crystals of the ground materials for structure elucidation using SCXRD.

#### **PDAN-1•SUBE Cocrystal**

**PDAN-1P** (56.4 mg, 0.2 mmol) and **suberic acid** (17.4 mg, 0.1 mmol) in 2:1 stoichiometry were ground in a mortar pestle in presence of catalytic amount (100  $\mu$ L) of acetonitrile solvent for about 15 minutes. After several batches of solution crystallization, we were not able to generate suitable single crystals of the ground materials for structure elucidation using SCXRD.

#### **PDAN-1•AZA Cocrystal**

**PDAN-1P** (56.4 mg, 0.2 mmol) and **azelaic acid** (18.8 mg, 0.1 mmol) in 2:1 stoichiometry were ground in a mortar pestle in presence of catalytic amount (100  $\mu$ L) of acetonitrile solvent for

about 15 minutes. The solution crystallization of the ground material in a mixture of chloroform, acetonitrile and methanol (3:1:0.5) solvent afforded block shaped single crystal of the product.

#### **PDAN-1•SEBA Cocrystal**

**PDAN-1P** (56.4 mg, 0.2 mmol) and **sebacic acid** (20.2 mg, 0.1 mmol) in 2:1 stoichiometry were ground in a mortar pestle in presence of catalytic amount (100  $\mu$ L) of acetonitrile solvent for about 15 minutes. The solution crystallization of the ground material in a mixture of chloroform, acetonitrile and methanol (3:1:0.5) solvent afforded block shaped single crystal of the product.

#### **PDAN-1•MEA molecular salt**

**PDAN-1P** (28.2 mg, 0.1 mmol) and **maleic acid** (11.6 mg, 0.1 mmol) in 1:1 stoichiometry were ground in a mortar pestle in presence of catalytic amount (100  $\mu$ L) of acetonitrile solvent for about 15 minutes. The solution crystallization of the ground material in a mixture of chloroform and acetonitrile (3:1) solvent afforded block shaped single crystal of the product.

#### **PDAN-1•FA Cocrystal**

**PDAN-1P** (56.4 mg, 0.2 mmol) and **fumaric acid** (11.6 mg, 0.1 mmol) in 2:1 stoichiometry were ground in a mortar pestle in presence of catalytic amount (100  $\mu$ L) of acetonitrile solvent for about 15 minutes. The solution crystallization of the ground material in a mixture of chloroform, acetonitrile and methanol (3:1:0.5) solvent afforded block shaped single crystal of the product.

## **2. Instrumental Details**

### **Powder X-ray diffraction (PXRD)**

PXRD measurements were performed at room temperature on a Rigaku Ultima IV X-ray powder diffractometer operating with a Cu K $\alpha$  X-ray source, equipped with a Ni filter to suppress K $\beta$  emission and a D/teX Ultra high-speed position sensitive detector, with a scan range  $2\theta = 5-50^\circ$ , step size of  $0.02^\circ$  and scan rate of  $10^\circ \text{ min}^{-1}$ .

### **Single crystal X-ray diffraction**

Single crystal X-ray diffraction (SCXRD) data of all the compounds were collected on a Bruker SMART APEX II CCD diffractometer equipped with a graphite monochromator and a Mo K $\alpha$  fine-focus sealed tube ( $\lambda = 0.71073 \text{ \AA}$ ). Data integration was done using SAINT. Intensities for absorption were corrected using SADABS. Structure solution and refinement were carried out using Bruker SHELXTL. The hydrogen atoms were refined isotropically, and all the other atoms were refined anisotropically. C–H hydrogens were fixed using the HFIX command in SHELXTL. Molecular graphics were prepared using X-SEED and Mercury licensed version 4.2.

### **Thermal analysis**

DSC measurements were performed on a Mettler Toledo DSC instrument with a temperature range 25–400 °C and heating rate of 10 °C min<sup>-1</sup> on sample on 40  $\mu$ L aluminium pan with pin-hole lid under an ultra-high pure nitrogen environment purged at 40 mL min<sup>-1</sup>. For the **PDAN-1B** two additional heating rates viz. 5 °C min<sup>-1</sup> and 20 °C min<sup>-1</sup> was used for thermal measurements.

### **Nanoindentation**

Crystals were mounted using cyanoacrylate glue on a stainless-steel disk-shaped sample holder having a smooth surface in such an orientation so that the major faces would be indented. The experiments were carried out using a nanoindenter (Hysitron Triboindenter, TI Premier, Minneapolis, USA) with a three-sided pyramidal Berkovich diamond indenter tip of radius 150 nm having an in-situ Scanning Probe Microscopy (SPM) facility. Before nanoindentation, the tip area function was calculated from a series of indentations on a standard fused quartz sample. The indentations were performed under the load control mode fixing the maximum load constant ( $P_{\text{max}}$ ) at 6 mN. The rates of loading and unloading were both 1200  $\mu\text{N s}^{-1}$  with 5 sec duration and a 2 sec holding period was applied at the maximum indentation depth. SPM images of the indentation impressions were captured immediately just after unloading to avoid any time dependent elastic shape recovery of the residual impressions. The obtained  $P$ – $h$  curves were analyzed using the standard Oliver–Pharr method to extract the required parameters, elastic modulus ( $E$ ), and hardness ( $H$ ) of the crystals.

### **Fluorescence lifetime study**

The fluorescence decay profile was performed using time-correlated single-photon counting (TCSPC) methods with HORIBA JOBIN YVON (single photon counting controller: Fluorohub, precision photo multiplier power supply: Fluoro3PS). For molecular excitation 371 nm, Nano-LED was used as a light source and an MCP photomultiplier tube (PMT) (Hamamatsu R3809U-50 series) was used as the detector and the decay was collected with 50 ns TAC range. Photoluminescence (PL) decay profiles were collected in a solid state and fitted multi-exponentially as indicated, and the average lifetime was considered for discussion.

### 3. PXRD analysis

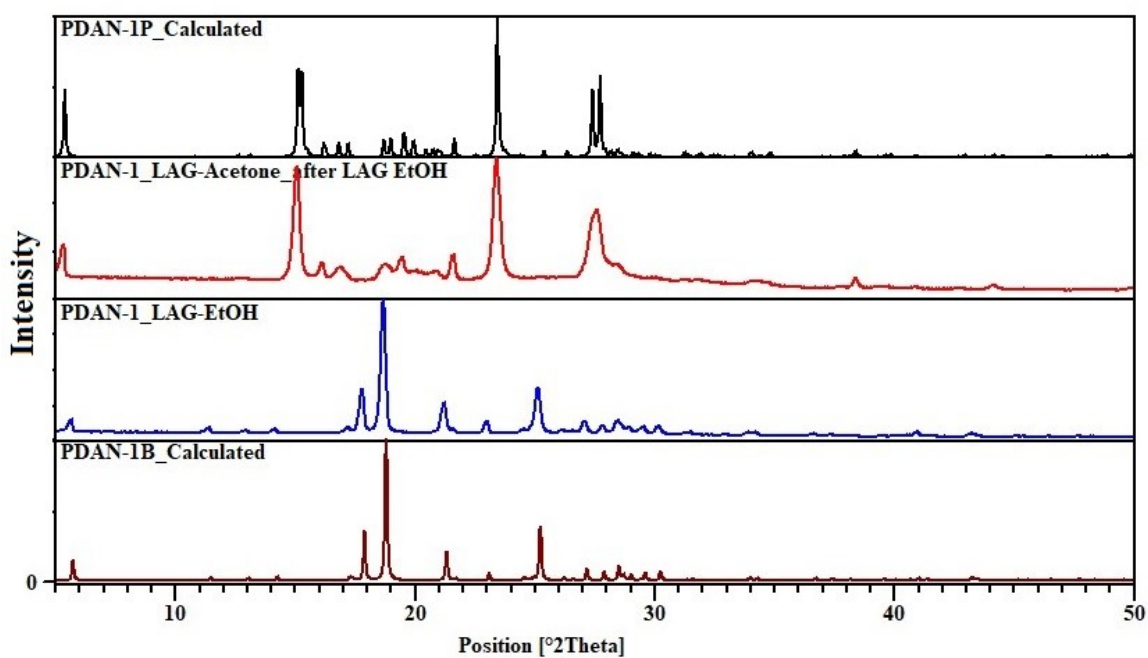

(a)

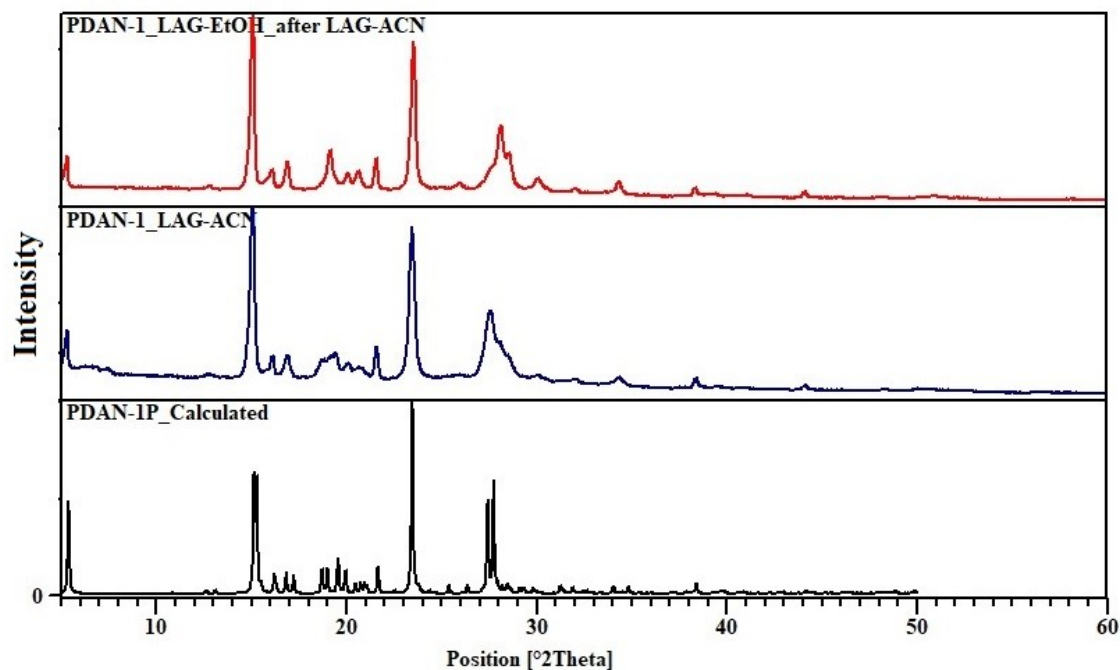

(b)

**Figure S1.** (a) Stack plots of PXRD patterns of the ground materials that show conversion of **PDAN-1B** to **PDAN-1P** form under mechanochemical condition; (b) stack plots of PXRD patterns of the ground materials that show irreversible nature of **PDAN-1P** form under mechanochemical condition.

#### 4. Thermal analysis

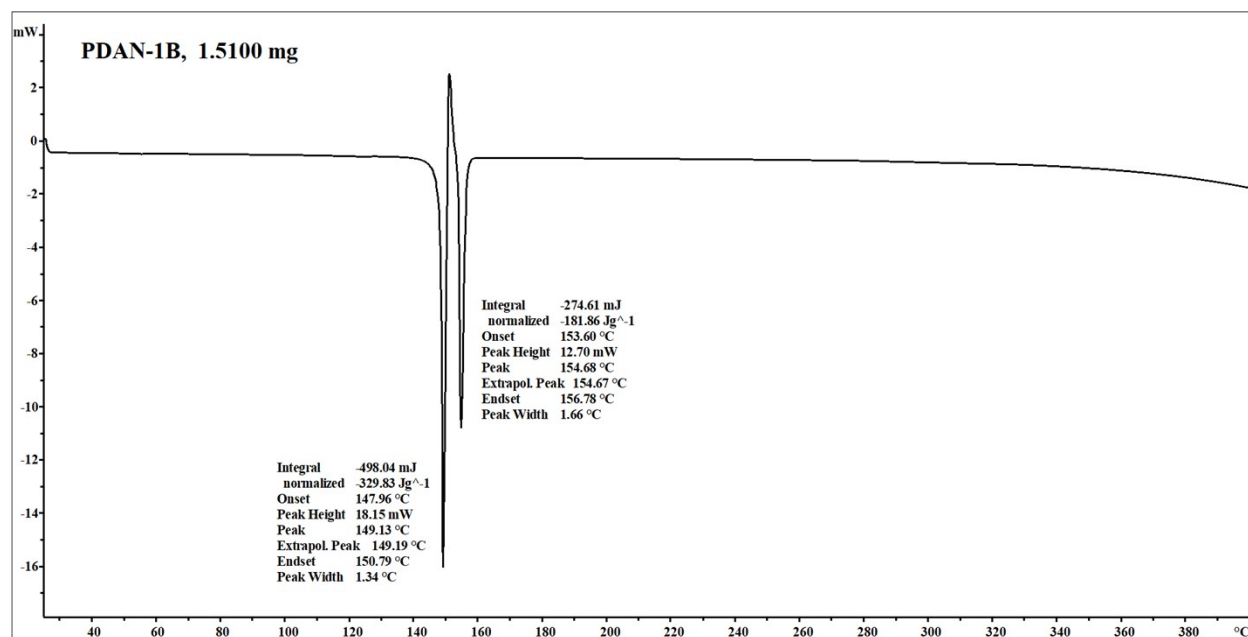

(a)

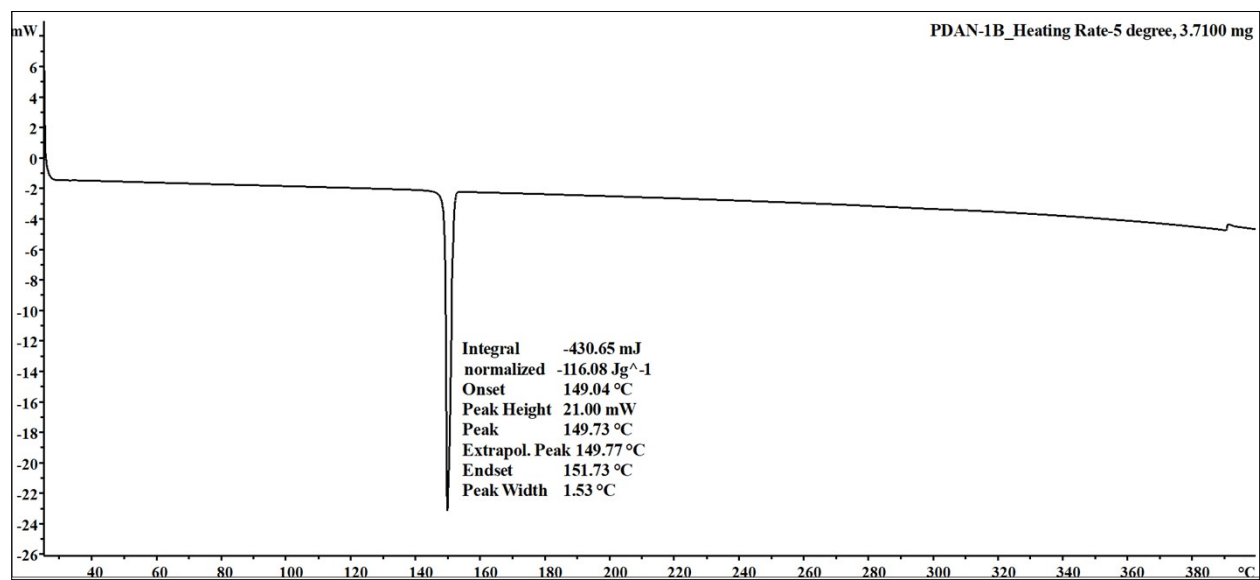

(b)

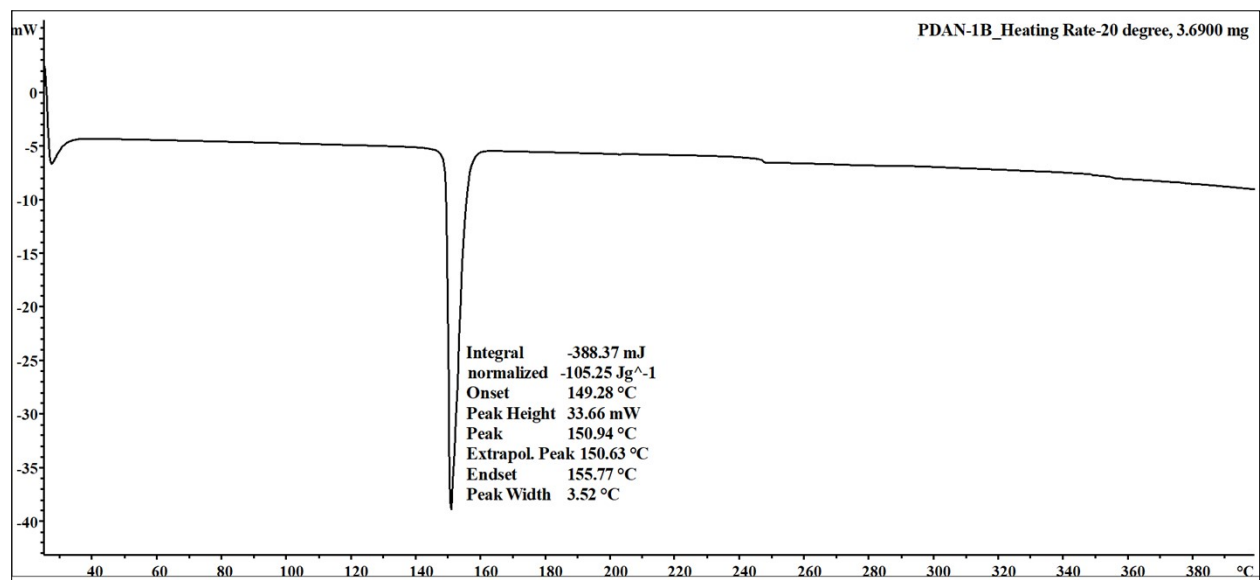

(c)

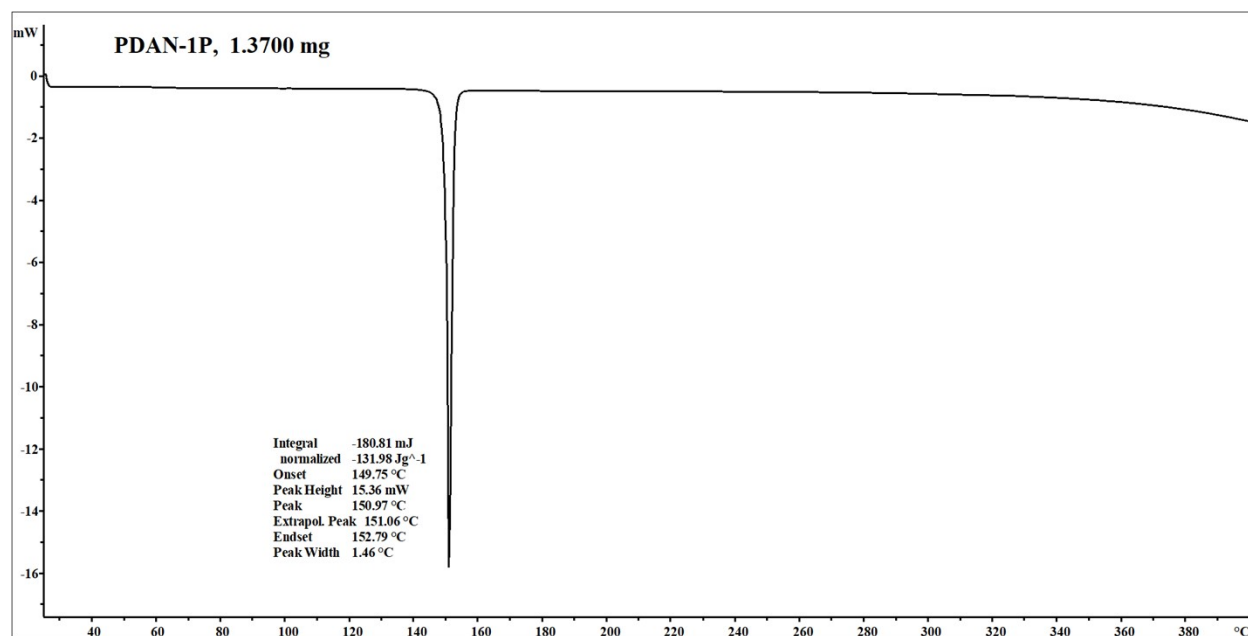

(d)

**Figure S2.** DSC thermogram of **PDAN-1B** at heating rate (a) 10 °C min<sup>-1</sup>, (b) 5 °C min<sup>-1</sup>, (c) 20 °C min<sup>-1</sup> and (d) **PDAN-1P** form at a heating rate of 10 °C min<sup>-1</sup>.

## 5. Phase purity analysis

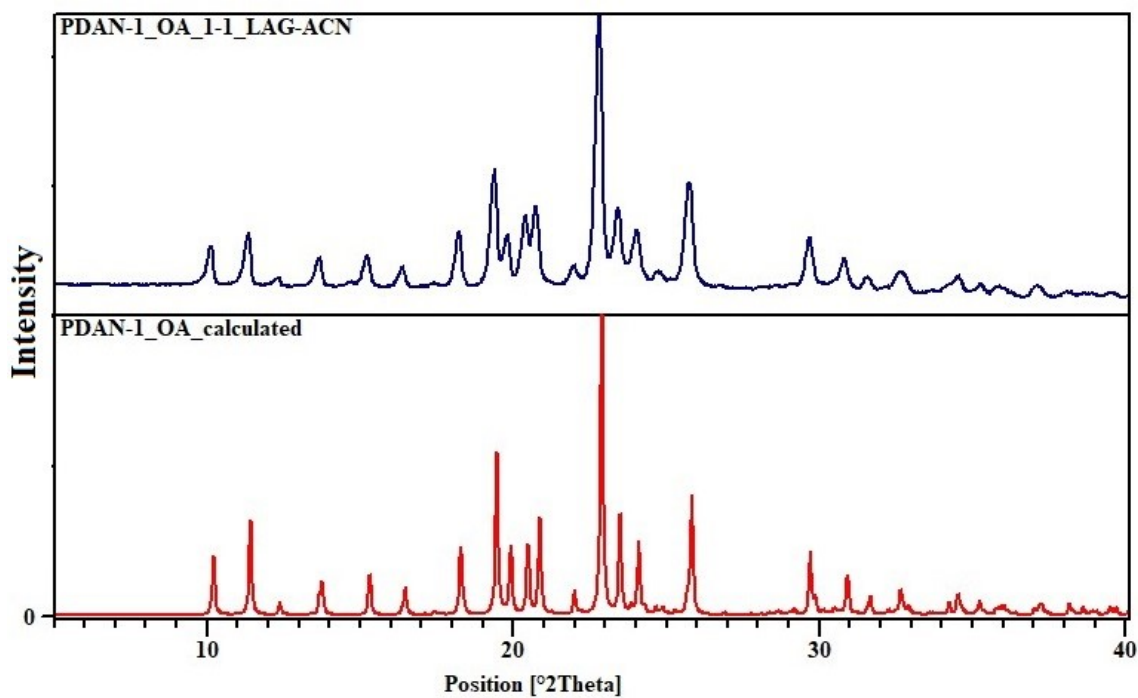

**Figure S3.** Comparison of calculated and experimental PXRD pattern of **PDAN-1•OA** salt cocrystal prepared using LAG with ACN.

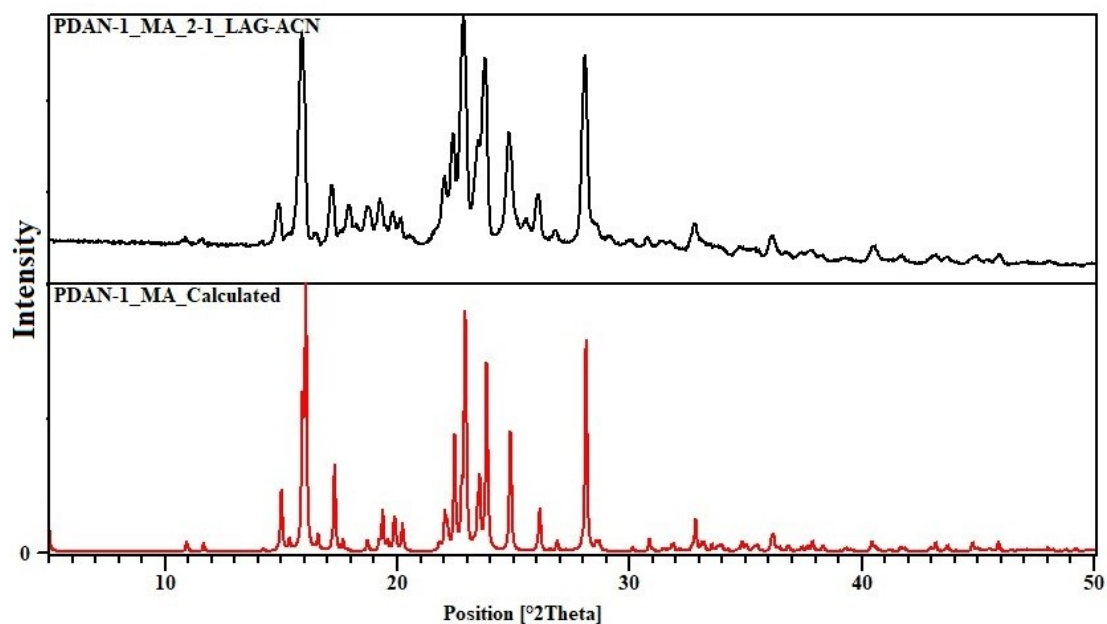

**Figure S4.** Comparison of calculated and experimental PXRD pattern of **PDAN-1•MA** cocrystal prepared using LAG with ACN.

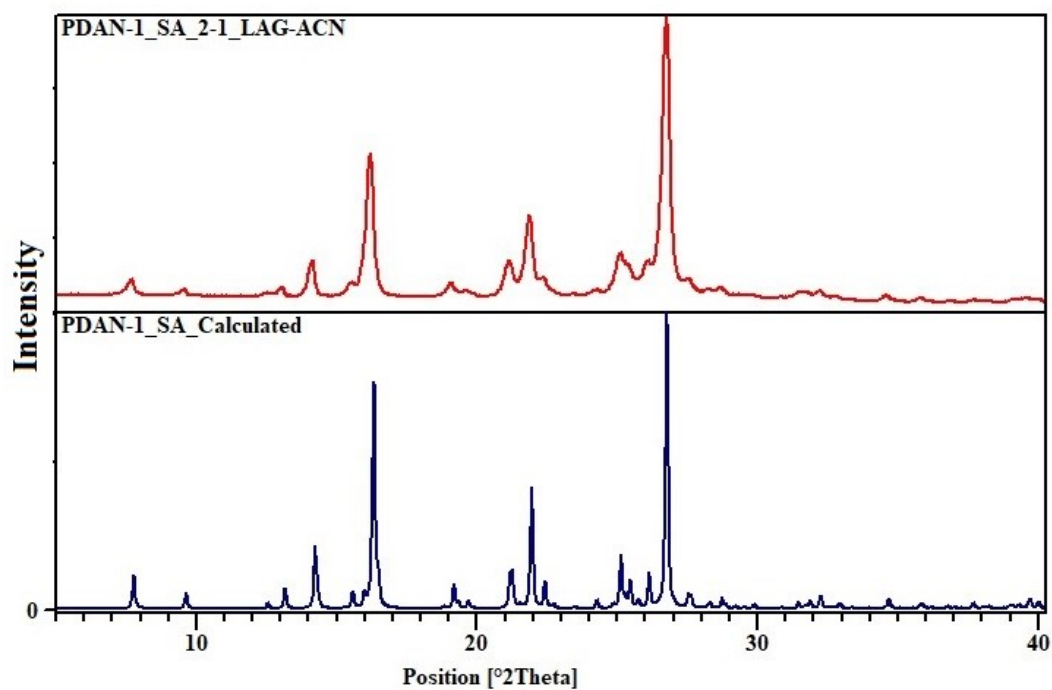

**Figure S5.** Comparison of calculated and experimental PXRD pattern of **PDAN-1•SA** cocrystal prepared using LAG with ACN.

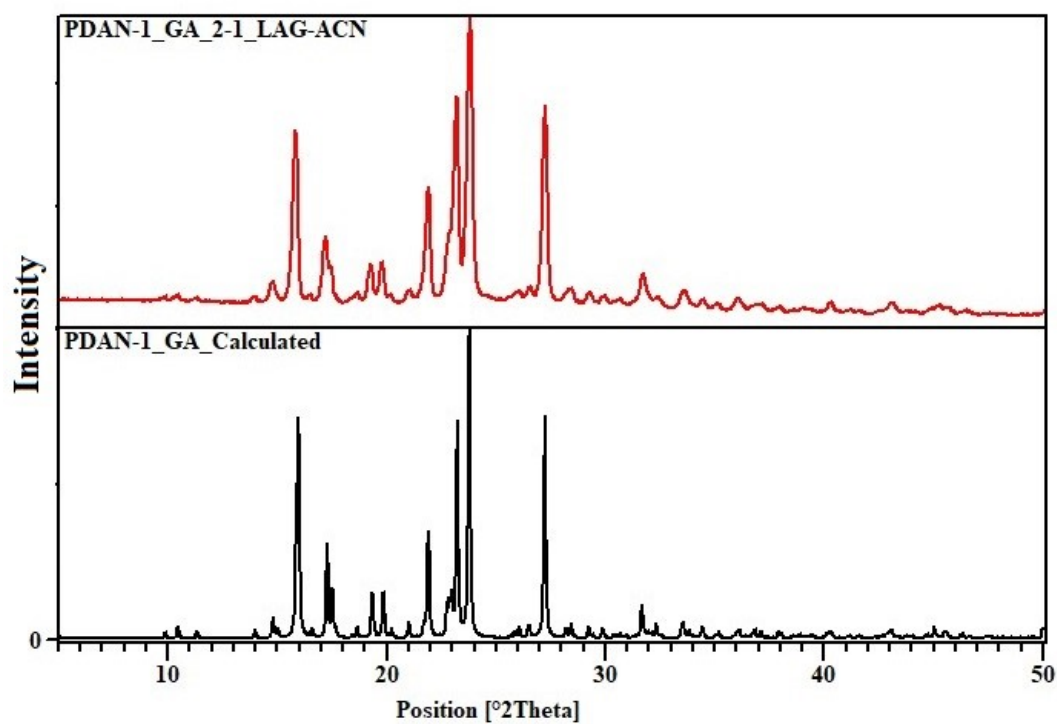

**Figure S6.** Comparison of calculated and experimental PXRD pattern of **PDAN-1•GA** cocrystal prepared using LAG with ACN.

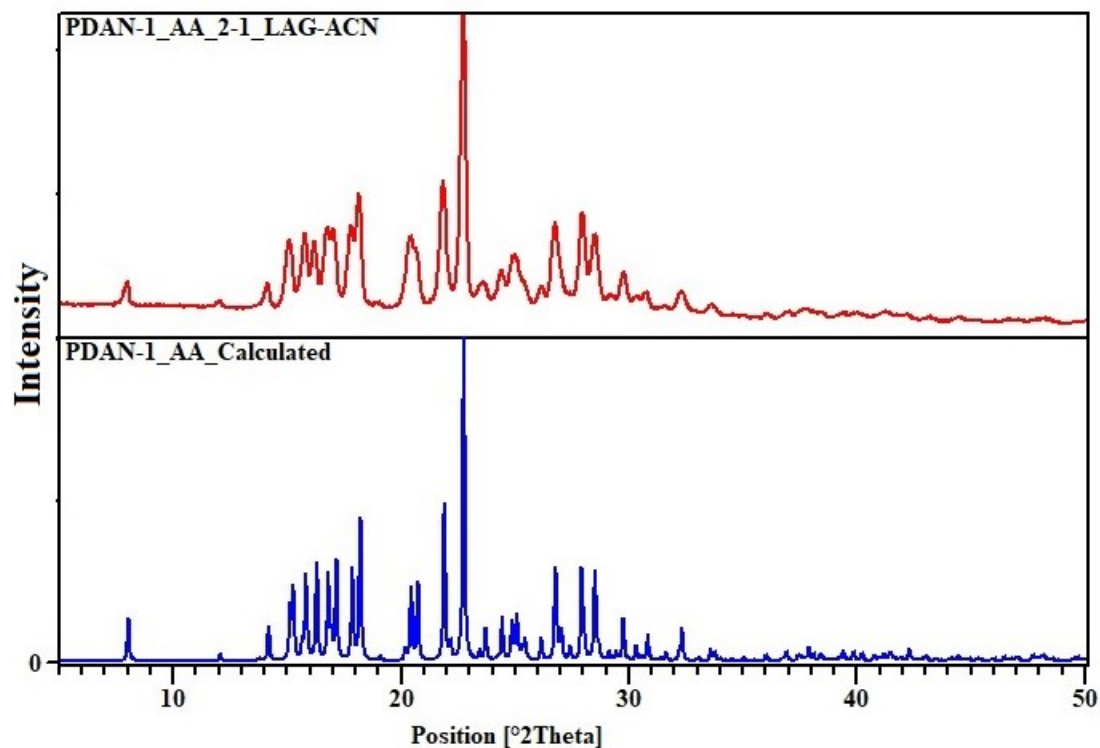

**Figure S7.** Comparison of calculated and experimental pxrd pattern of **PDAN-1•AA** cocrystal prepared using LAG with ACN.

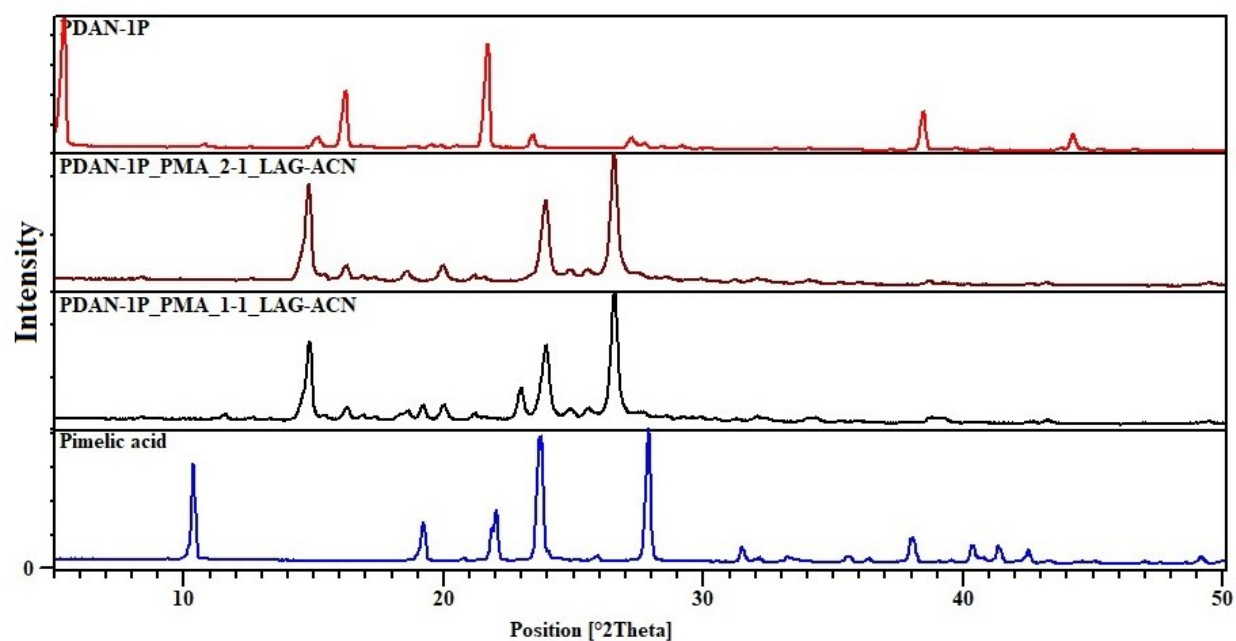

**Figure S8.** Comparison of PXRD pattern of **PDAN-1•PMA** with that of the starting materials.

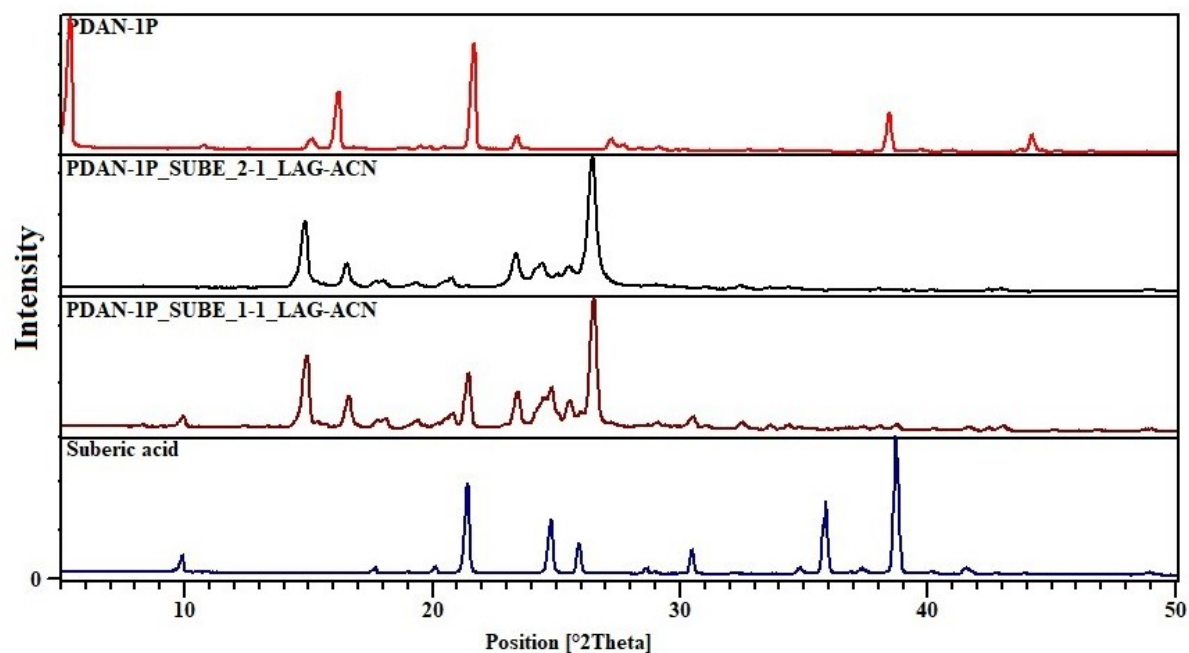

**Figure S9.** Comparison of PXRD pattern of **PDAN-1•SUBE** with that of the starting materials.

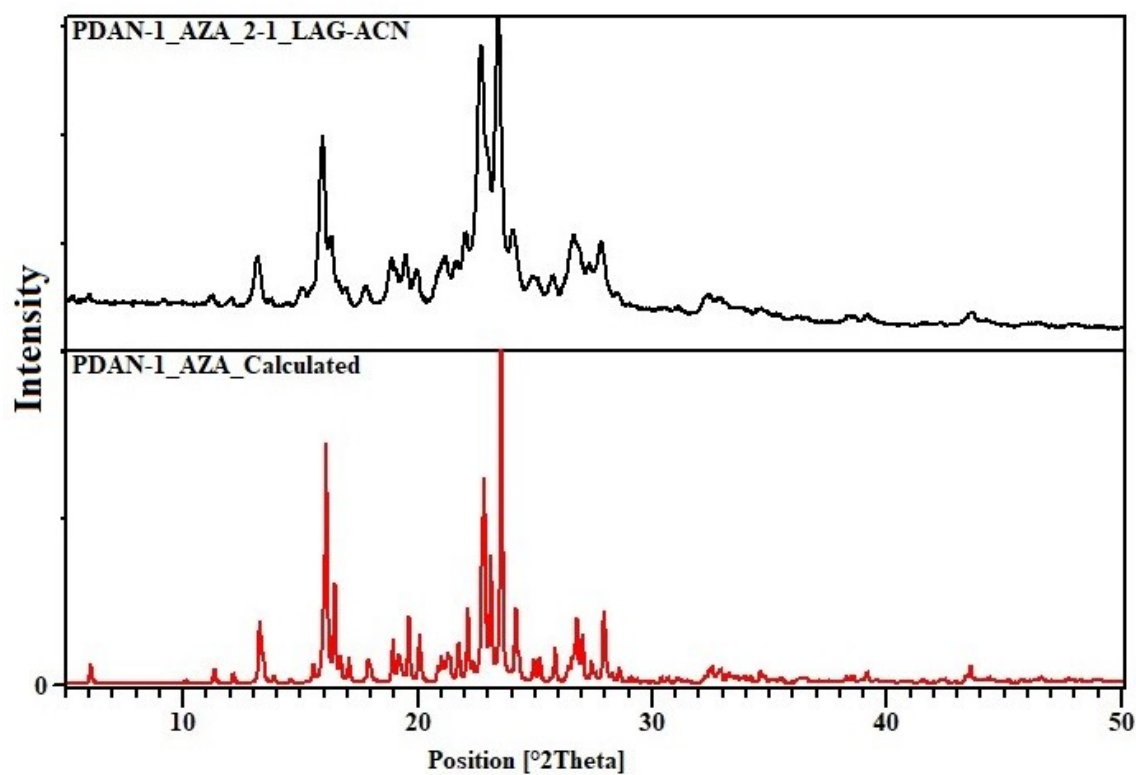

**Figure S10.** Comparison of calculated and experimental pxrd pattern of **PDAN-1•AZA** cocrystal prepared using LAG with ACN.

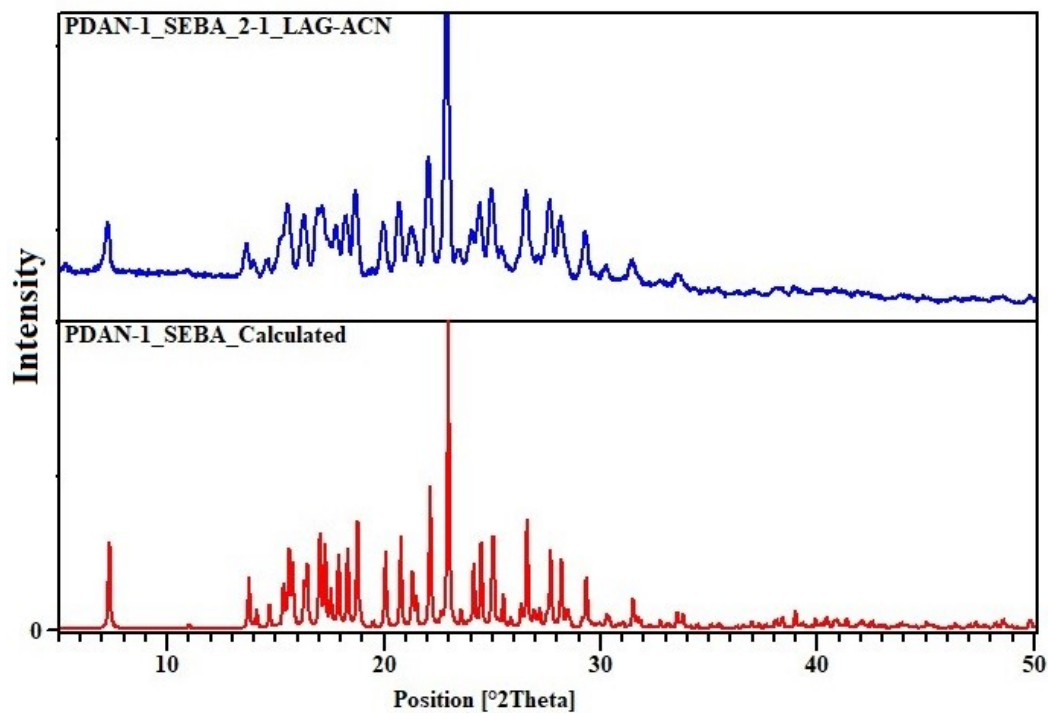

**Figure S11.** Comparison of calculated and experimental pxrd pattern of **PDAN-1•SEBA** cocrystal prepared using LAG with ACN.

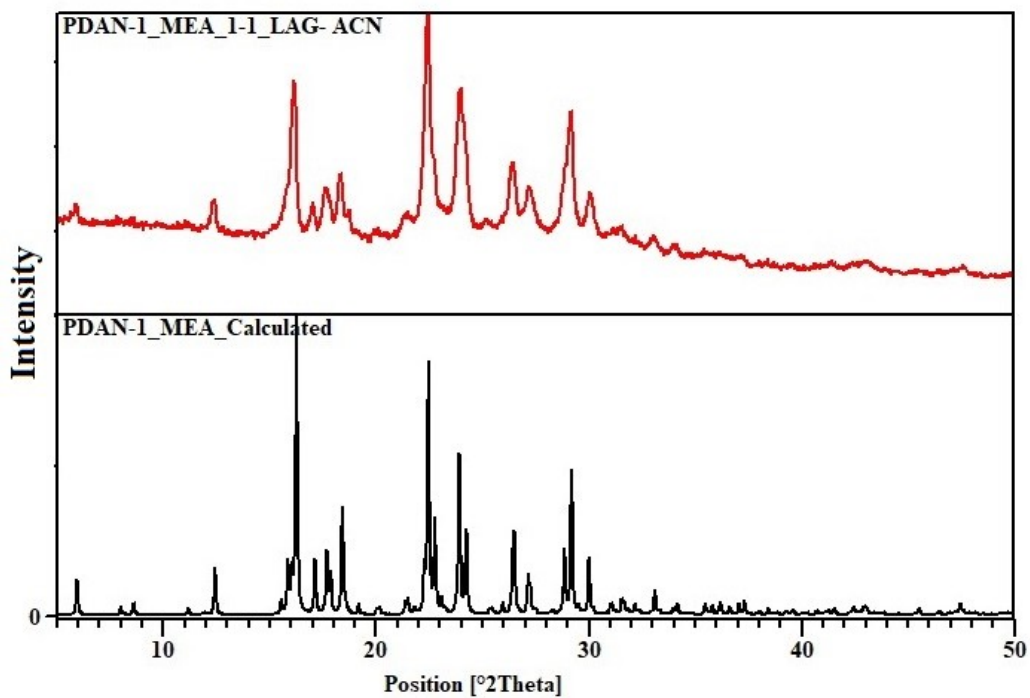

**Figure S12.** Comparison of calculated and experimental pxrd pattern of **PDAN-1•MEA** molecular salt prepared using LAG with ACN.

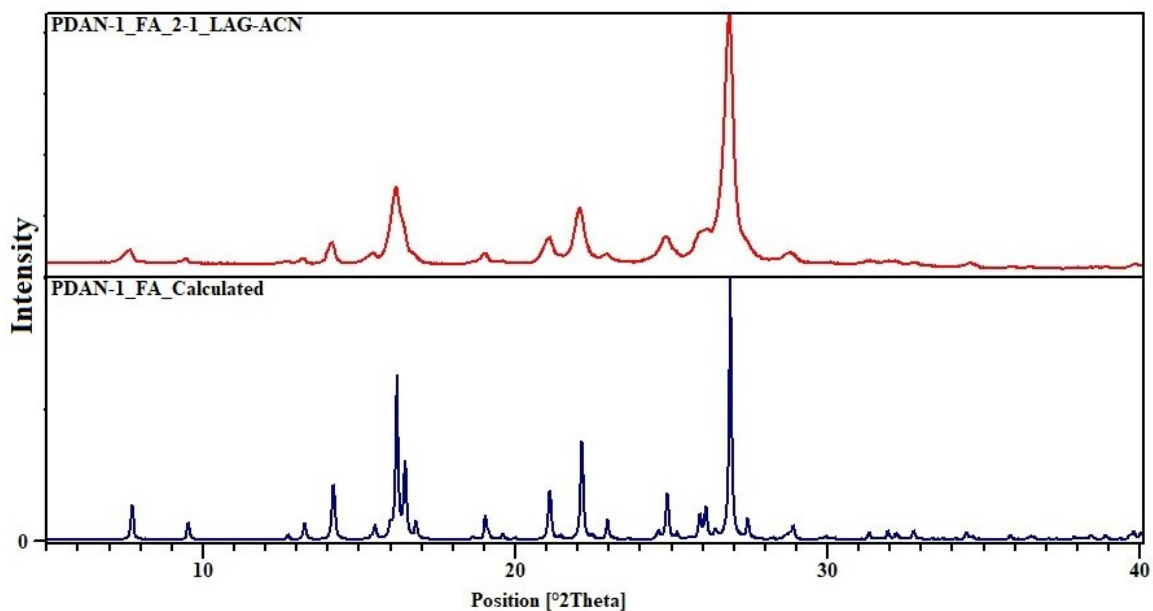

**Figure S13.** Comparison of calculated and experimental PXRD pattern of **PDAN-1•FA** cocrystal prepared using LAG with ACN.

## 6. Polymorph screening of all the PDAN-1 dicarboxylic acid cocrystals

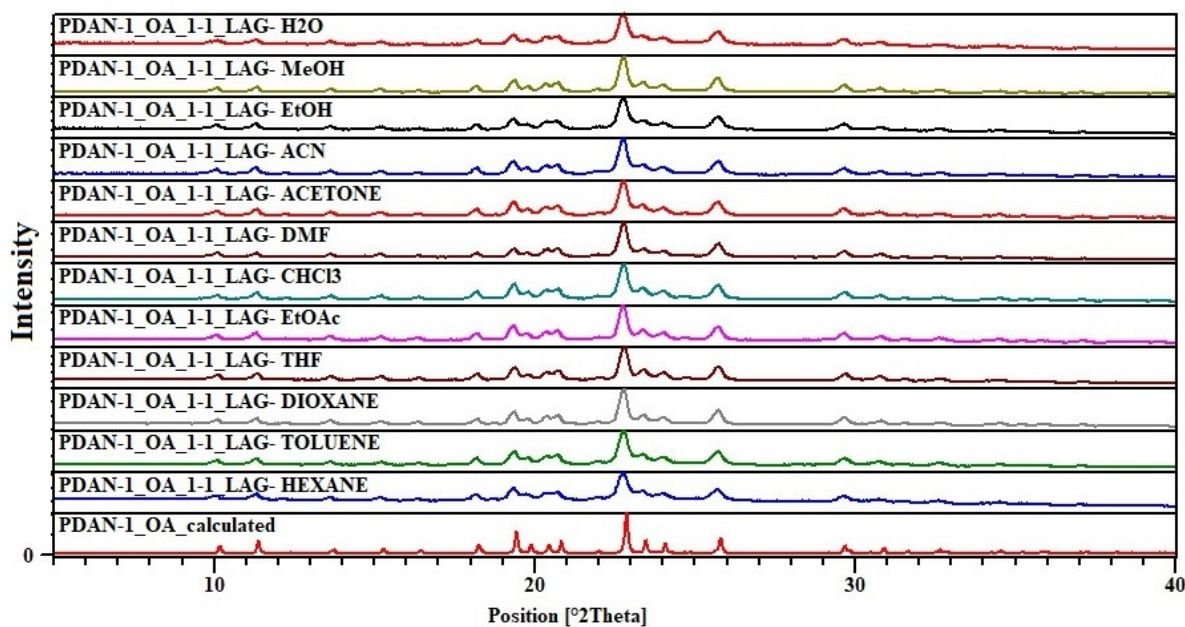

**Figure S14.** PXRD patterns of the ground materials of **PDAN-1•OA** using LAG with different liquids.

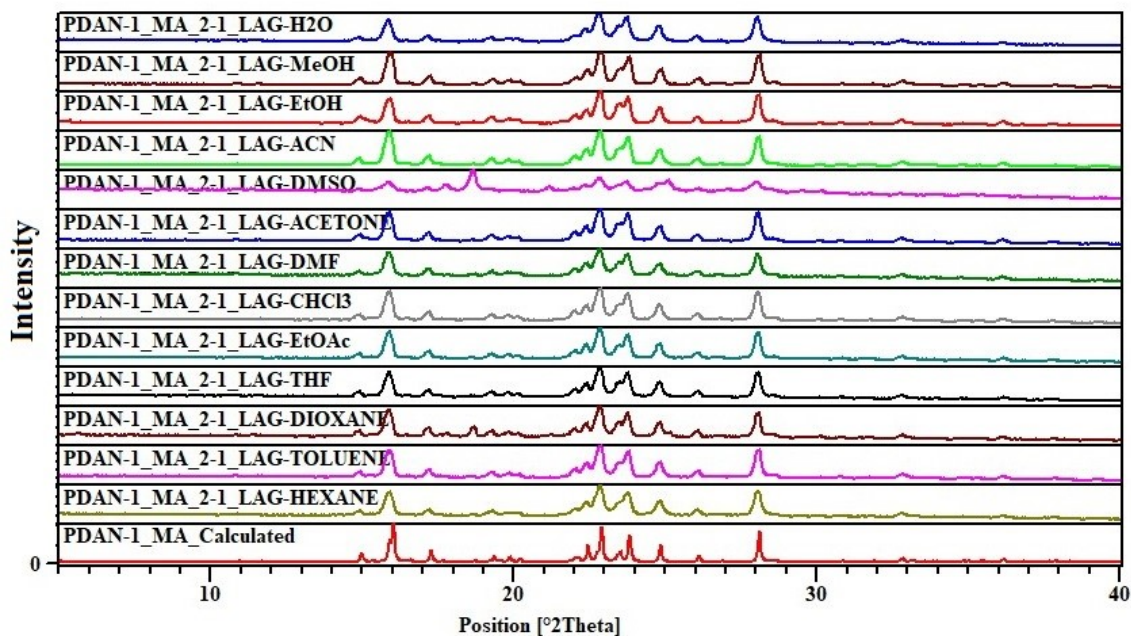

**Figure S15.** PXRD patterns of the ground materials of **PDAN-1•MA** using LAG with different liquids.

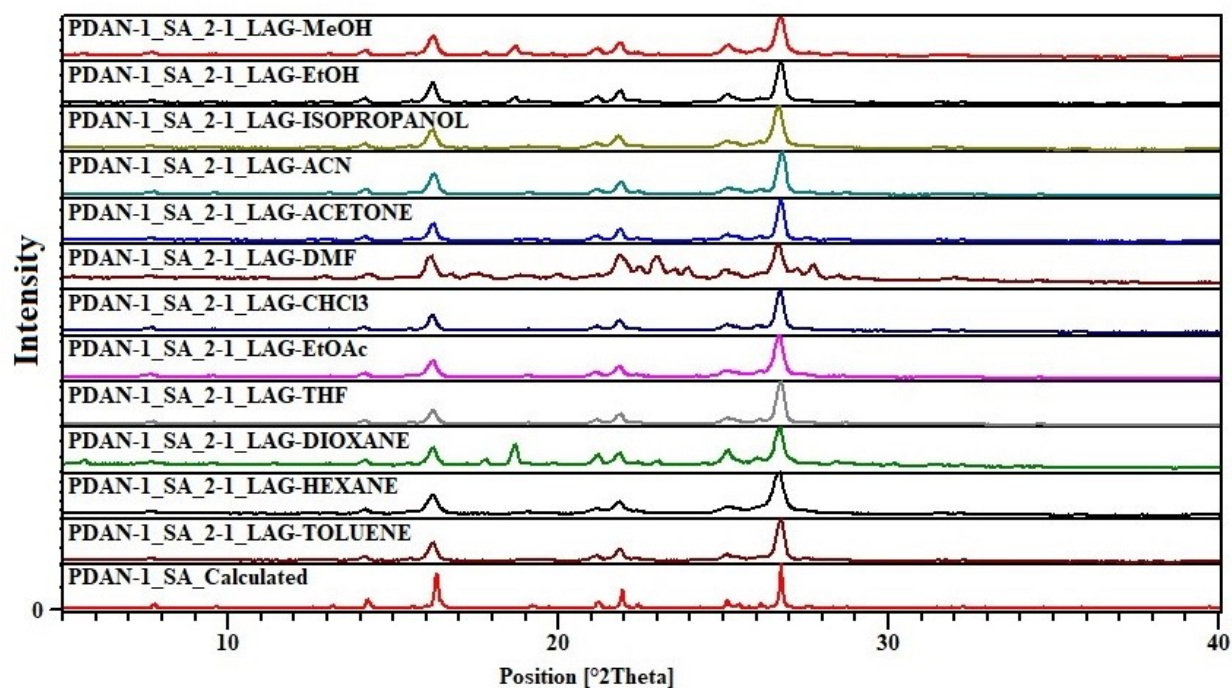

**Figure S16.** PXRD patterns of the ground materials of **PDAN-1•SA** using LAG with different liquids.

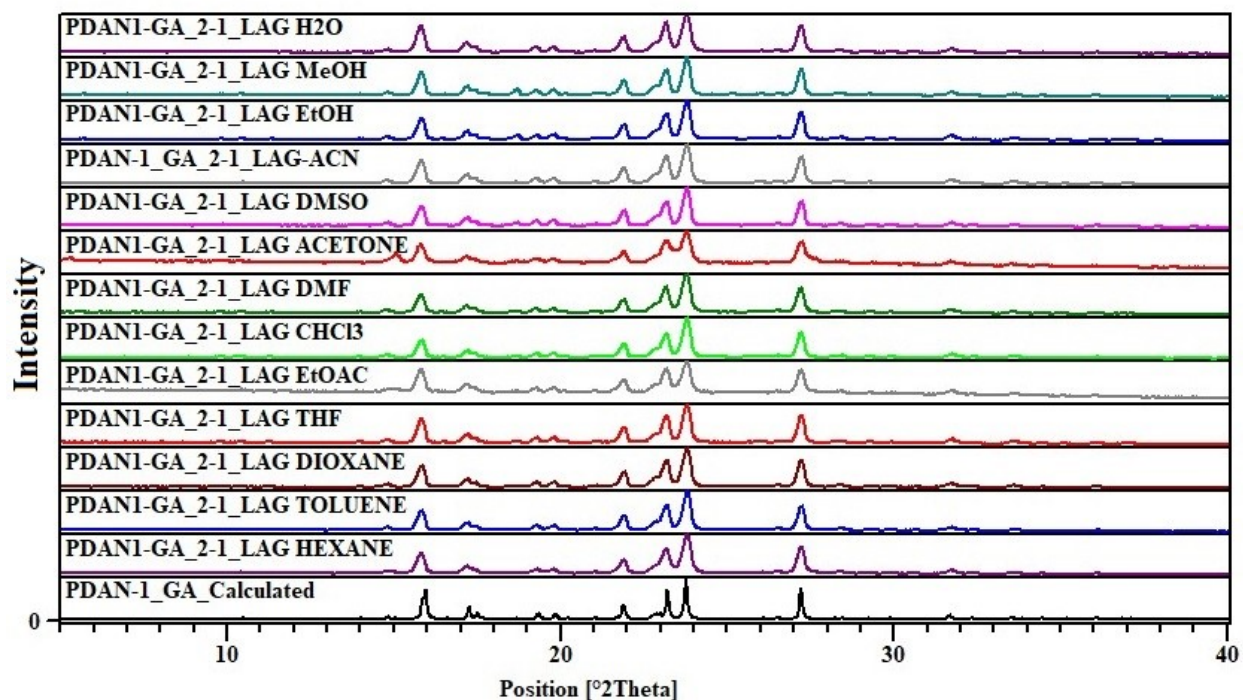

**Figure S17.** PXRD patterns of the ground materials of **PDAN-1•GA** using LAG with different liquids.

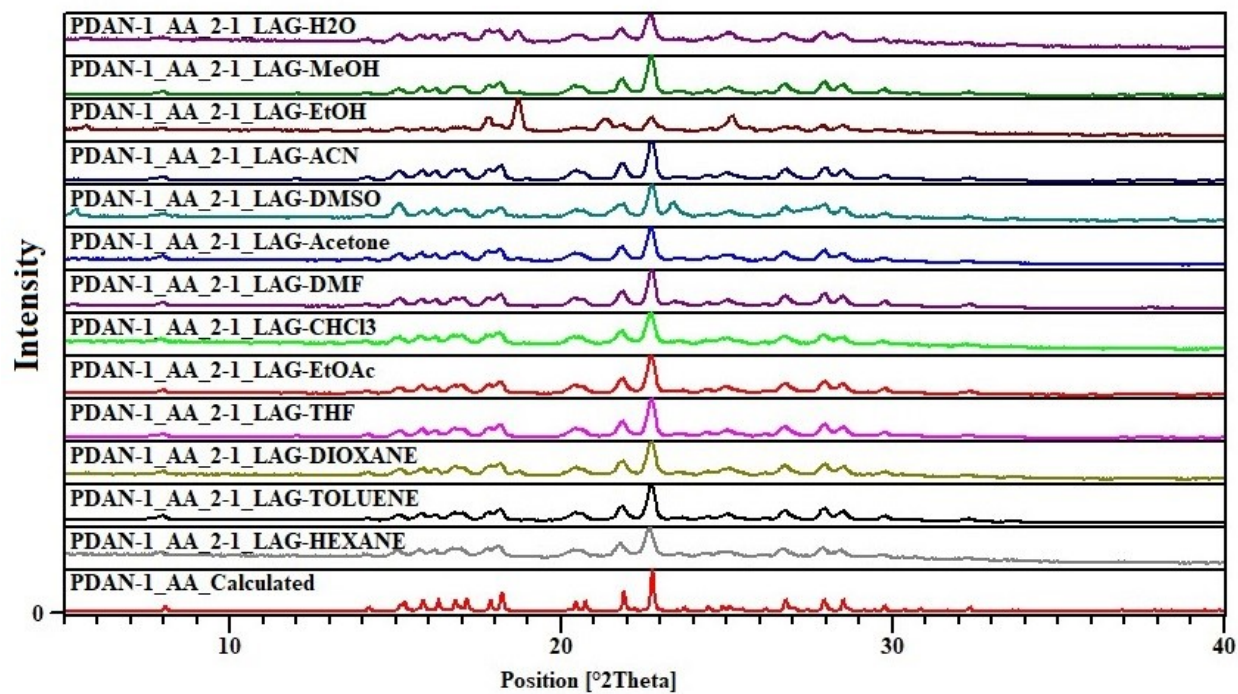

**Figure S18.** PXRD patterns of the ground materials of **PDAN-1•AA** using LAG with different liquids.

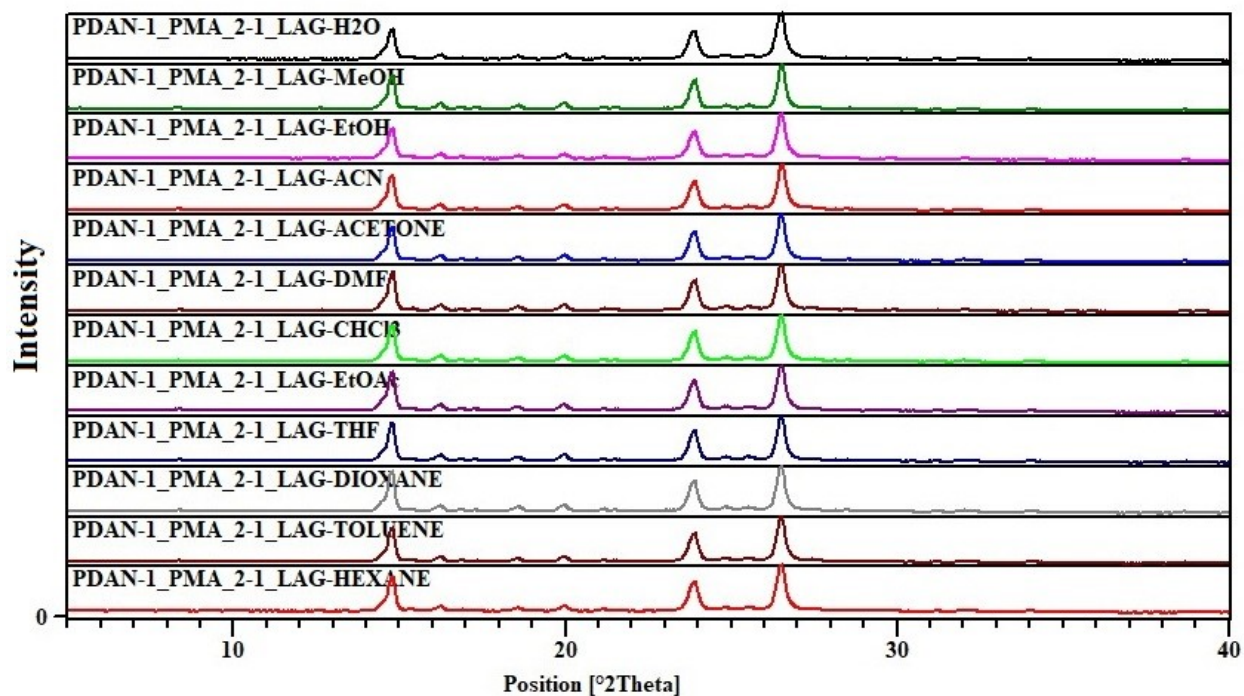

**Figure S19.** PXRD patterns of the ground materials of **PDAN-1•PMA** using LAG with different liquids.

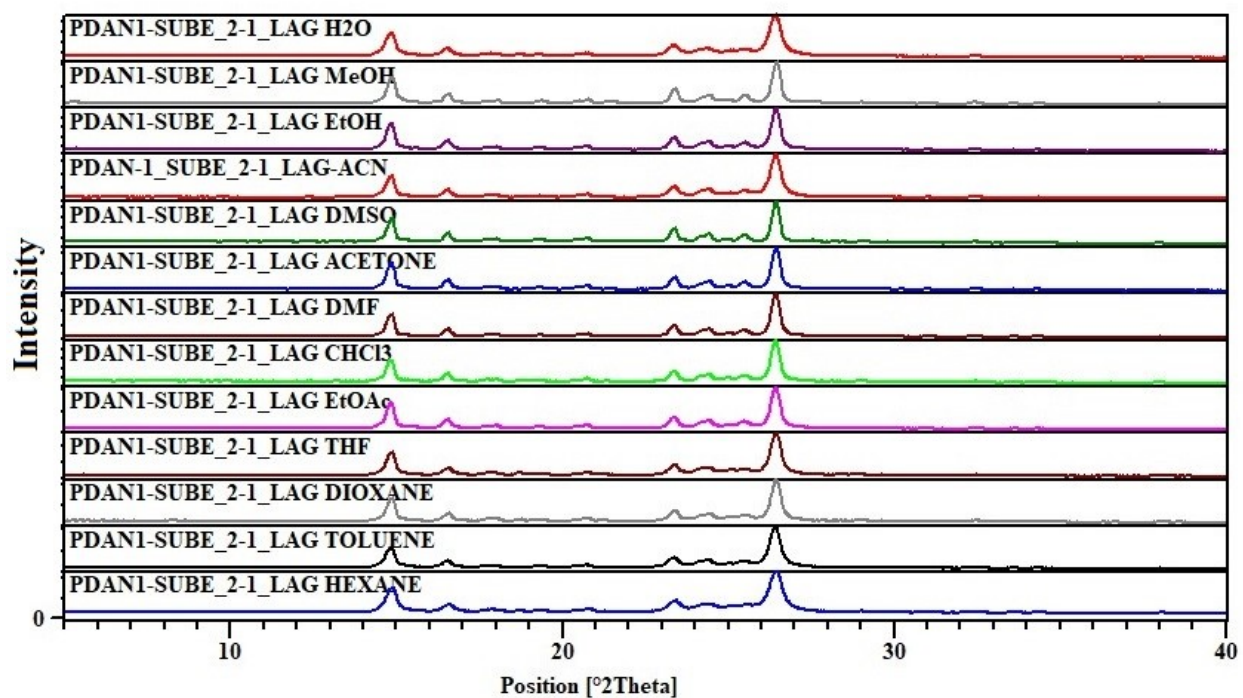

**Figure S20.** PXRD patterns of the ground materials of **PDAN-1•SUBE** using LAG with different liquids.

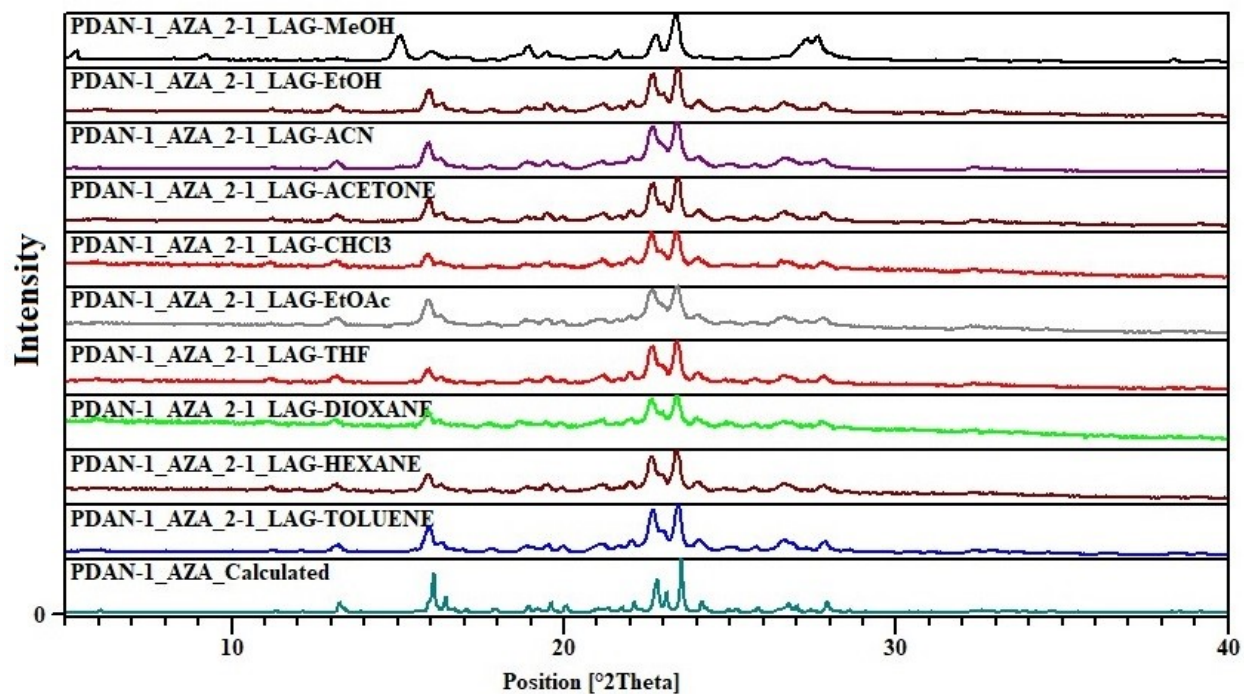

**Figure S21.** PXRD patterns of the ground materials of **PDAN-1•AZA** using LAG with different liquids.

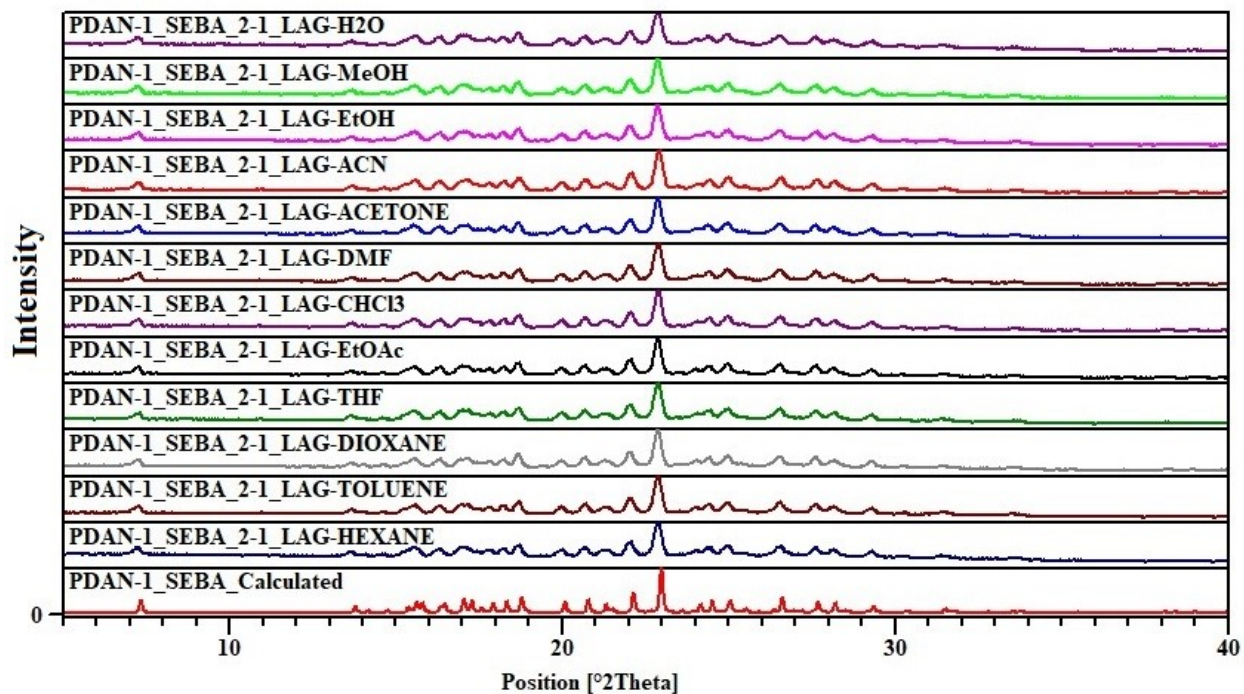

**Figure S22.** PXRD patterns of the ground materials of **PDAN-1•SEBA** using LAG with different liquids.

**7. Table S1.** Crystallographic parameters of **PDAN-1** and cocrystals/salts

|                                                     | <b>PDAN-1B</b>                                 | <b>PDAN-1P</b>                                 | <b>PDAN-1P-Rigaku</b>                          |
|-----------------------------------------------------|------------------------------------------------|------------------------------------------------|------------------------------------------------|
| Chemical formula                                    | C <sub>20</sub> H <sub>14</sub> N <sub>2</sub> | C <sub>20</sub> H <sub>14</sub> N <sub>2</sub> | C <sub>20</sub> H <sub>14</sub> N <sub>2</sub> |
| $M_r$                                               | 282.33                                         | 282.33                                         | 282.33                                         |
| Crystal system                                      | Monoclinic                                     | Triclinic                                      | Triclinic                                      |
| Space group                                         | <i>Pc</i>                                      | <i>P1</i>                                      | <i>P1</i>                                      |
| Temperature (K)                                     | 293                                            | 296                                            | 293                                            |
| $a$ (Å)                                             | 15.3938 (7)                                    | 6.05 (10)                                      | 5.9138 (13)                                    |
| $b$ (Å)                                             | 6.7893 (3)                                     | 7.73 (13)                                      | 7.5874 (9)                                     |
| $c$ (Å)                                             | 7.2409 (6)                                     | 17.2 (3)                                       | 16.538 (2)                                     |
| $\alpha$ (°)                                        | 90                                             | 91.5 (4)                                       | 92.910 (12)                                    |
| $\beta$ (°)                                         | 90.158 (2)                                     | 98.6 (3)                                       | 97.60 (2)                                      |
| $\gamma$ (°)                                        | 90                                             | 92.4 (3)                                       | 92.256 (14)                                    |
| $V$ (Å <sup>3</sup> )                               | 756.77 (8)                                     | 793 (23)                                       | 733.8 (2)                                      |
| $Z$                                                 | 2                                              | 2                                              | 2                                              |
| Radiation type                                      | Mo $K\alpha$                                   | Mo $K\alpha$                                   | Cu $K\alpha$                                   |
| $\mu$ (mm <sup>-1</sup> )                           | 0.07                                           | 0.07                                           | 0.59                                           |
| $D_{\text{calcd}}$ (g cm <sup>-3</sup> )            | 1.239                                          | 1.182                                          | 1.278                                          |
| Diffractometer                                      | Bruker APEX-II<br>CCD                          | Bruker APEX-II<br>CCD                          | XtaLAB Synergy,<br>Dualflex, HyPix             |
| No. of measured reflections                         | 6179                                           | 10928                                          | 7516                                           |
| No. of observed [ $I > 2\sigma(I)$ ]<br>reflections | 1601                                           | 2722                                           | 3073                                           |
| $R_{\text{int}}$                                    | 0.085                                          | 0.130                                          | 0.130                                          |
| $R[F^2 > 2\sigma(F^2)]$ , ,                         | 0.046                                          | 0.184                                          | 0.202                                          |
| $wR(F^2)$                                           | 0.093                                          | 0.468                                          | 0.550                                          |
| $S$                                                 | 0.97                                           | 1.17                                           | 2.52                                           |
| No. of reflections                                  | 2334                                           | 5727                                           | 3790                                           |
| $\Delta\rho_{\text{max}}$ (e Å <sup>-3</sup> )      | 0.12                                           | 0.70                                           | 1.08                                           |
| CCDC No.                                            | 2393120                                        | 2393121                                        | 2441999                                        |

|                  | <b>PDAN-1•OA</b>                                                                                                                           | <b>PDAN-1•MA</b>                                                                                | <b>PDAN-1•SA</b>                                                                                   |
|------------------|--------------------------------------------------------------------------------------------------------------------------------------------|-------------------------------------------------------------------------------------------------|----------------------------------------------------------------------------------------------------|
| Chemical formula | C <sub>20</sub> H <sub>15</sub> N <sub>2</sub> •0.5(C <sub>2</sub> H <sub>2</sub> O <sub>4</sub> )<br>•0.5(C <sub>2</sub> O <sub>4</sub> ) | 2(C <sub>20</sub> H <sub>14</sub> N <sub>2</sub> )•C <sub>3</sub> H <sub>4</sub> O <sub>4</sub> | C <sub>20</sub> H <sub>14</sub> N <sub>2</sub> •0.5(C <sub>4</sub> H <sub>6</sub> O <sub>4</sub> ) |
| $M_r$            | 372.37                                                                                                                                     | 668.72                                                                                          | 341.37                                                                                             |

|                                                  |                           |                           |                           |
|--------------------------------------------------|---------------------------|---------------------------|---------------------------|
| Crystal system                                   | Triclinic                 | Monoclinic                | Triclinic                 |
| Space group                                      | $P\bar{1}$                | $C2/c$                    | $P\bar{1}$                |
| Temperature (K)                                  | 296                       | 296                       | 296                       |
| $a$ (Å)                                          | 8.9403 (16)               | 35.665 (3)                | 6.8519 (12)               |
| $b$ (Å)                                          | 9.6410 (17)               | 5.9784 (5)                | 11.458 (2)                |
| $c$ (Å)                                          | 11.136 (2)                | 16.2082 (14)              | 11.848 (2)                |
| $\alpha$ (°)                                     | 78.092 (4)                | 90                        | 103.848 (4)               |
| $\beta$ (°)                                      | 81.505 (4)                | 94.387 (4)                | 96.792 (4)                |
| $\gamma$ (°)                                     | 77.354 (4)                | 90                        | 97.046 (4)                |
| $V$ (Å <sup>3</sup> )                            | 911.1 (3)                 | 3445.8 (5)                | 885.7 (3)                 |
| $Z$                                              | 2                         | 4                         | 2                         |
| Radiation type                                   | Mo $K\alpha$              | Mo $K\alpha$              | Mo $K\alpha$              |
| $\mu$ (mm <sup>-1</sup> )                        | 0.10                      | 0.08                      | 0.08                      |
| $D_{\text{calcd}}$ (g cm <sup>-3</sup> )         | 1.357                     | 1.289                     | 1.280                     |
| Diffractometer                                   | Bruker <i>APEX-II</i> CCD | Bruker <i>APEX-II</i> CCD | Bruker <i>APEX-II</i> CCD |
| No. of measured reflections                      | 18380                     | 33806                     | 18333                     |
| No. of observed [ $I > 2\sigma(I)$ ] reflections | 3182                      | 2804                      | 3093                      |
| $R_{\text{int}}$                                 | 0.044                     | 0.030                     | 0.024                     |
| $R[F^2 > 2\sigma(F^2)]$ , ,                      | 0.037                     | 0.041                     | 0.041                     |
| $wR(F^2)$                                        | 0.114                     | 0.129                     | 0.129                     |
| $S$                                              | 0.94                      | 0.96                      | 0.99                      |
| No. of reflections                               | 3707                      | 3549                      | 3610                      |
| $\Delta\rho_{\text{max}}$ (e Å <sup>-3</sup> )   | 0.15                      | 0.14                      | 0.24                      |
| CCDC No.                                         | 2393122                   | 2393127                   | 2393126                   |

|                  | <b>PDAN-1•GA</b>                                                                                | <b>PDAN-1•AA</b>                                                                                    | <b>PDAN-1•AZA</b>                                                                                |
|------------------|-------------------------------------------------------------------------------------------------|-----------------------------------------------------------------------------------------------------|--------------------------------------------------------------------------------------------------|
| Chemical formula | 2(C <sub>20</sub> H <sub>14</sub> N <sub>2</sub> )•C <sub>5</sub> H <sub>8</sub> O <sub>4</sub> | C <sub>20</sub> H <sub>14</sub> N <sub>2</sub> •0.5(C <sub>6</sub> H <sub>10</sub> O <sub>4</sub> ) | 2(C <sub>20</sub> H <sub>14</sub> N <sub>2</sub> )•C <sub>9</sub> H <sub>16</sub> O <sub>4</sub> |
| $M_r$            | 696.78                                                                                          | 355.40                                                                                              | 752.88                                                                                           |
| Crystal system   | Monoclinic                                                                                      | Monoclinic                                                                                          | Monoclinic                                                                                       |
| Space group      | $C2/c$                                                                                          | $P2_1/n$                                                                                            | $P2_1/c$                                                                                         |
| Temperature (K)  | 296                                                                                             | 296                                                                                                 | 296                                                                                              |
| $a$ (Å)          | 35.879 (5)                                                                                      | 6.6656 (9)                                                                                          | 43.708 (7)                                                                                       |
| $b$ (Å)          | 5.9716 (8)                                                                                      | 43.969 (6)                                                                                          | 8.3458 (13)                                                                                      |
| $c$ (Å)          | 16.917 (3)                                                                                      | 7.2128 (10)                                                                                         | 11.0983 (17)                                                                                     |
| $\alpha$ (°)     | 90                                                                                              | 90                                                                                                  | 90                                                                                               |

|                                                  |                            |                            |                            |
|--------------------------------------------------|----------------------------|----------------------------|----------------------------|
| $\beta$ (°)                                      | 93.199 (4)                 | 115.616 (3)                | 90.164 (4)                 |
| $\gamma$ (°)                                     | 90                         | 90                         | 90                         |
| $V$ (Å <sup>3</sup> )                            | 3618.9 (9)                 | 1906.1 (5)                 | 4048.4 (11)                |
| $Z$                                              | 4                          | 4                          | 4                          |
| Radiation type                                   | Mo $K\alpha$               | Mo $K\alpha$               | Mo $K\alpha$               |
| $\mu$ (mm <sup>-1</sup> )                        | 0.08                       | 0.08                       | 0.08                       |
| $D_{\text{calcd}}$ (g cm <sup>-3</sup> )         | 1.279                      | 1.238                      | 1.235                      |
| Diffractometer                                   | Bruker <i>APEX</i> -II CCD | Bruker <i>APEX</i> -II CCD | Bruker <i>APEX</i> -II CCD |
| No. of measured reflections                      | 34478                      | 26092                      | 53812                      |
| No. of observed [ $I > 2\sigma(I)$ ] reflections | 3575                       | 4030                       | 6410                       |
| $R_{\text{int}}$                                 | 0.041                      | 0.047                      | 0.062                      |
| $R[F^2 > 2\sigma(F^2)]$ , ,                      | 0.052                      | 0.064                      | 0.062                      |
| $wR(F^2)$                                        | 0.190                      | 0.185                      | 0.212                      |
| $S$                                              | 0.98                       | 1.01                       | 1.00                       |
| No. of reflections                               | 5345                       | 5831                       | 12403                      |
| $\Delta\rho_{\text{max}}$ (e Å <sup>-3</sup> )   | 0.21                       | 0.21                       | 0.30                       |
| CCDC No.                                         | 2393128                    | 2393124                    | 2393129                    |

|                                          | <b>PDAN-1•SEBA</b>                                                                                   | <b>PDAN-1•MEA</b>                                                                            | <b>PDAN-1•FA</b>                                                                                   |
|------------------------------------------|------------------------------------------------------------------------------------------------------|----------------------------------------------------------------------------------------------|----------------------------------------------------------------------------------------------------|
| Chemical formula                         | C <sub>20</sub> H <sub>14</sub> N <sub>2</sub> •0.5(C <sub>10</sub> H <sub>18</sub> O <sub>4</sub> ) | C <sub>20</sub> H <sub>15</sub> N <sub>2</sub> •C <sub>4</sub> H <sub>3</sub> O <sub>4</sub> | C <sub>20</sub> H <sub>15</sub> N <sub>2</sub> •0.5(C <sub>4</sub> H <sub>2</sub> O <sub>4</sub> ) |
| $M_r$                                    | 383.45                                                                                               | 398.40                                                                                       | 340.37                                                                                             |
| Crystal system                           | Monoclinic                                                                                           | Monoclinic                                                                                   | Triclinic                                                                                          |
| Space group                              | $P2_1/n$                                                                                             | $P2_1/c$                                                                                     | $P\bar{1}$                                                                                         |
| Temperature (K)                          | 296                                                                                                  | 293                                                                                          | 296                                                                                                |
| $a$ (Å)                                  | 6.6460 (16)                                                                                          | 30.897 (3)                                                                                   | 6.842 (3)                                                                                          |
| $b$ (Å)                                  | 48.219 (11)                                                                                          | 11.6158 (12)                                                                                 | 11.415 (4)                                                                                         |
| $c$ (Å)                                  | 7.1154 (16)                                                                                          | 22.946 (2)                                                                                   | 11.977 (4)                                                                                         |
| $\alpha$ (°)                             | 90                                                                                                   | 90                                                                                           | 104.802 (8)                                                                                        |
| $\beta$ (°)                              | 114.288 (4)                                                                                          | 105.539 (3)                                                                                  | 97.205 (9)                                                                                         |
| $\gamma$ (°)                             | 90                                                                                                   | 90                                                                                           | 98.435 (8)                                                                                         |
| $V$ (Å <sup>3</sup> )                    | 2078.4 (8)                                                                                           | 7934.2 (13)                                                                                  | 881.5 (6)                                                                                          |
| $Z$                                      | 4                                                                                                    | 16                                                                                           | 2                                                                                                  |
| Radiation type                           | Mo $K\alpha$                                                                                         | Mo $K\alpha$                                                                                 | Mo $K\alpha$                                                                                       |
| $\mu$ (mm <sup>-1</sup> )                | 0.08                                                                                                 | 0.09                                                                                         | 0.08                                                                                               |
| $D_{\text{calcd}}$ (g cm <sup>-3</sup> ) | 1.225                                                                                                | 1.334                                                                                        | 1.282                                                                                              |

|                                                      |                           |                           |                           |
|------------------------------------------------------|---------------------------|---------------------------|---------------------------|
| Diffractometer                                       | Bruker <i>APEX-II</i> CCD | Bruker <i>APEX-II</i> CCD | Bruker <i>APEX-II</i> CCD |
| No. of measured reflections                          | 18702                     | 162323                    | 16192                     |
| No. of observed [ $I > 2\sigma(I)$ ] reflections     | 4698                      | 8094                      | 3048                      |
| $R_{\text{int}}$                                     | 0.042                     | 0.050                     | 0.042                     |
| $R[F^2 > 2\sigma(F^2)]$ , ,                          | 0.071                     | 0.078                     | 0.057                     |
| $wR(F^2)$                                            | 0.207                     | 0.277                     | 0.156                     |
| $S$                                                  | 1.05                      | 1.04                      | 1.03                      |
| No. of reflections                                   | 6206                      | 16470                     | 5388                      |
| $\Delta\rho_{\text{max}}(\text{e } \text{\AA}^{-3})$ | 0.31                      | 0.48                      | 0.20                      |
| CCDC No.                                             | 2393123                   | 2393130                   | 2393125                   |

## 8. Photo-physical property of synthesized cocrystals/salts

### UV-vis Spectra

The UV-Visible spectra of all the synthesized cocrystals are recorded which give absorbance peaks at around 337-340 nm (Figure S23).

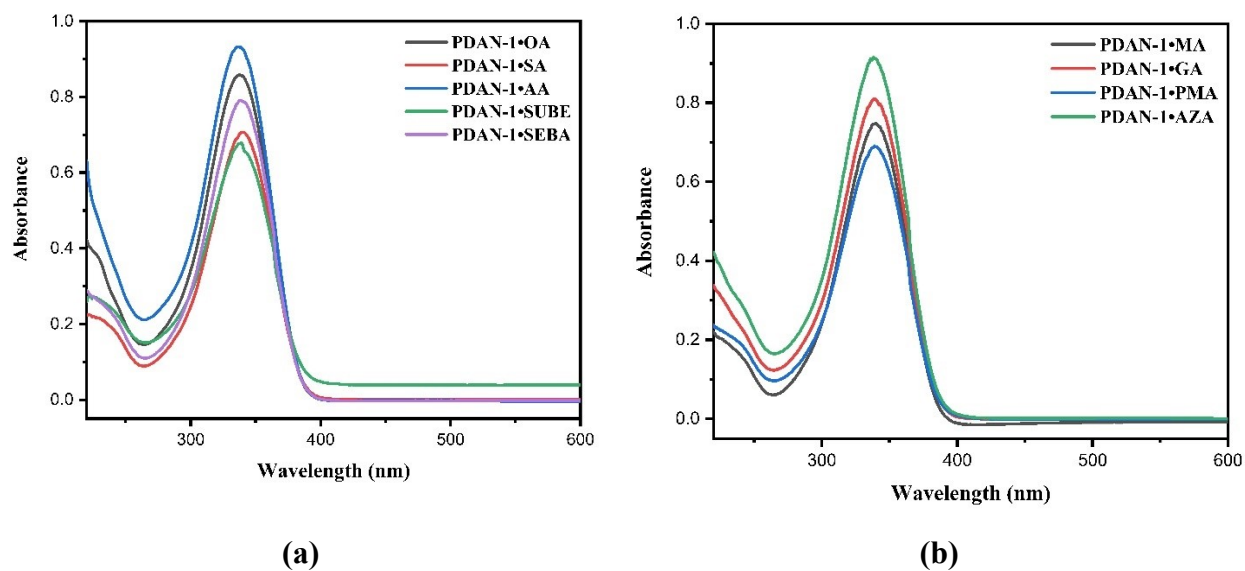

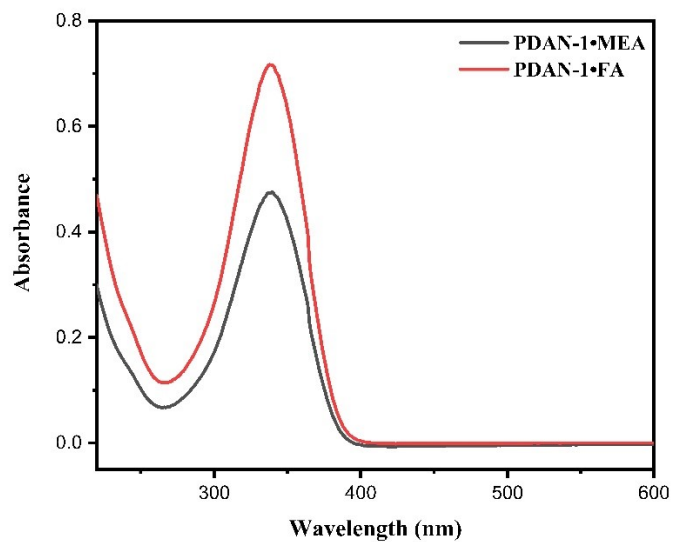

(c)

**Figure S23.** The solution-state uv-visible spectra of (a) **PDAN-1** with even diacids viz. **PDAN-1•OA**, **PDAN-1•SA**, **PDAN-1•AA**, **PDAN-1•SUBE** and **PDAN-1•SEBA**; (b) **PDAN-1** with odd diacids viz. **PDAN-1•MA**, **PDAN-1•GA**, **PDAN-1•PMA** and **PDAN-1•AZA**; (c) **PDAN-1•MEA** and **PDAN-1•FA** cocrystals.

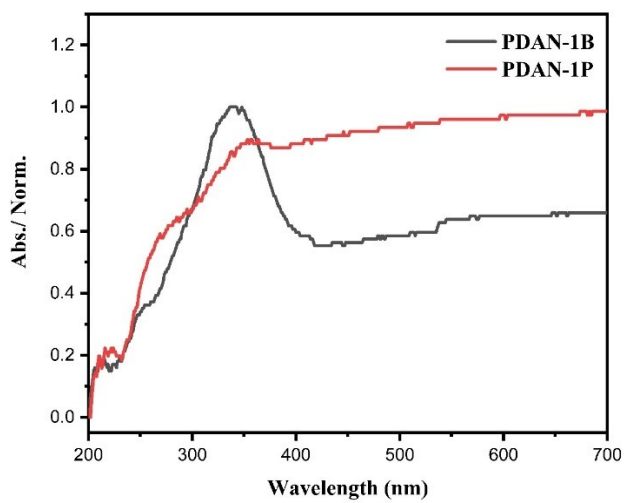

(a)

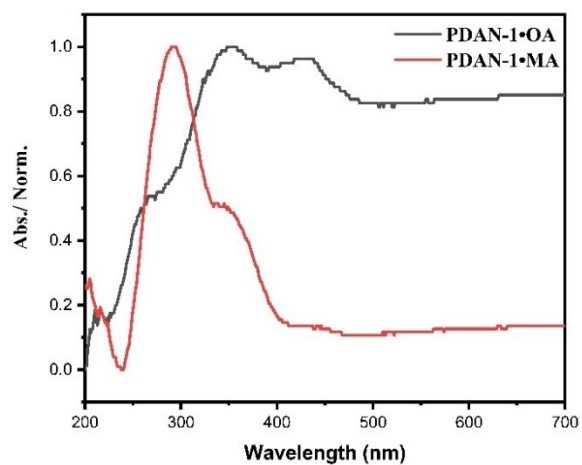

(b)

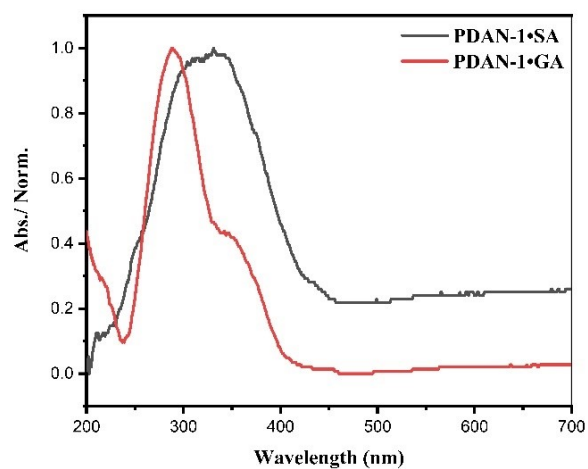

(c)

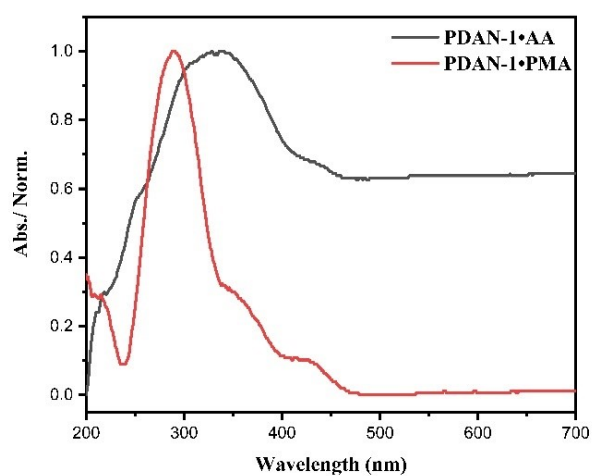

(d)

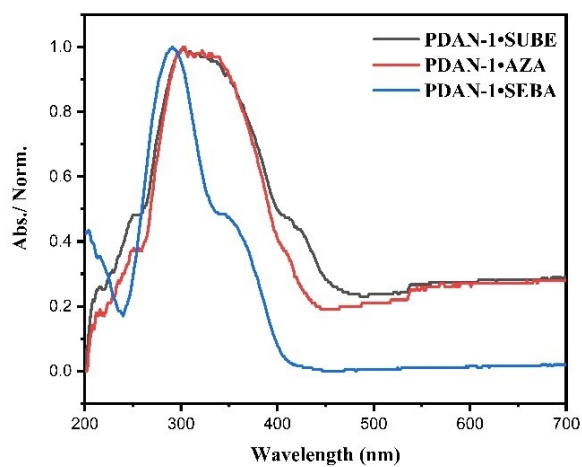

(e)

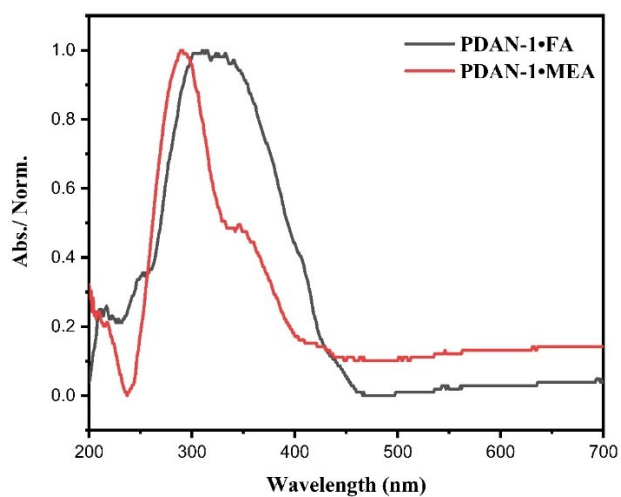

(f)

**Figure S24.** The solid-state uv-visible spectra of (a) **PDAN-1B** and **PDAN-1P**; (b) **PDAN-1•OA** and **PDAN-1•MA**; (c) **PDAN-1•SA** and **PDAN-1•GA**; (d) **PDAN-1•AA** and **PDAN-1•PMA**; (e) **PDAN-1•SUBE**, **PDAN-1•AZA** and **PDAN-1•SEBA**; (f) **PDAN-1•MEA** and **PDAN-1•FA**.

## Fluorescence Spectra

Solid-state fluorescence spectra of all the cocrystals are recorded at an excitation wavelength of 365 nm. The fluorescence spectra of the cocrystals having diacids with even numbered C-atoms give an emission in blue region with an emission center at around 400-450 nm except for C<sub>8</sub> (gives a cyan emission). On the other hand, the cocrystals having diacids with odd numbered C-atoms has an emission in comparatively longer wavelength region (470-500 nm) giving cyan color (C<sub>9</sub> is an exception with blue color) (Figure S25).

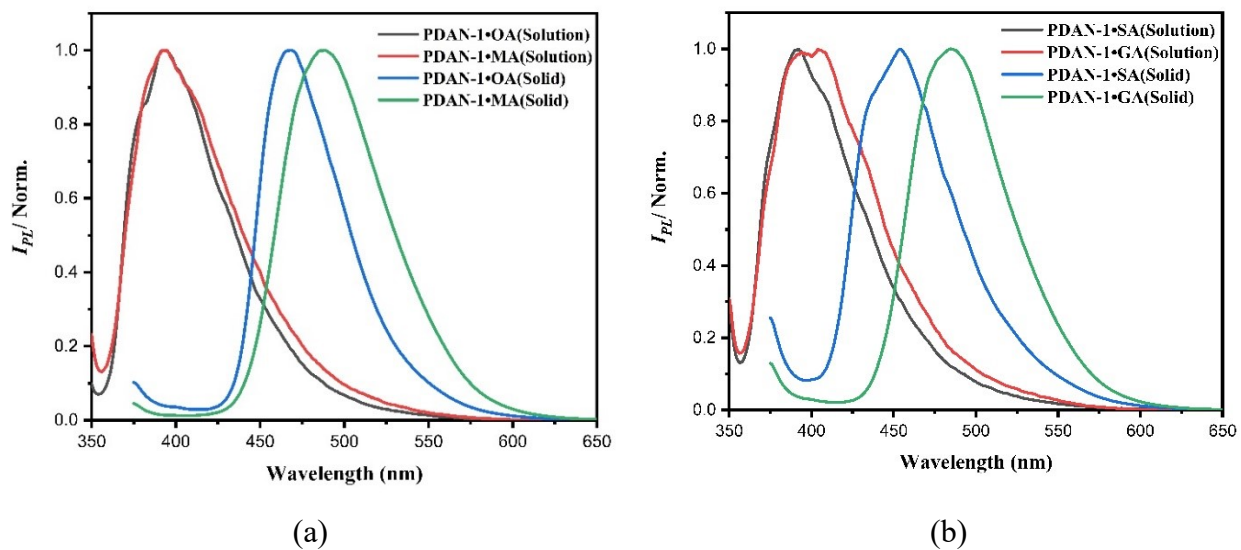

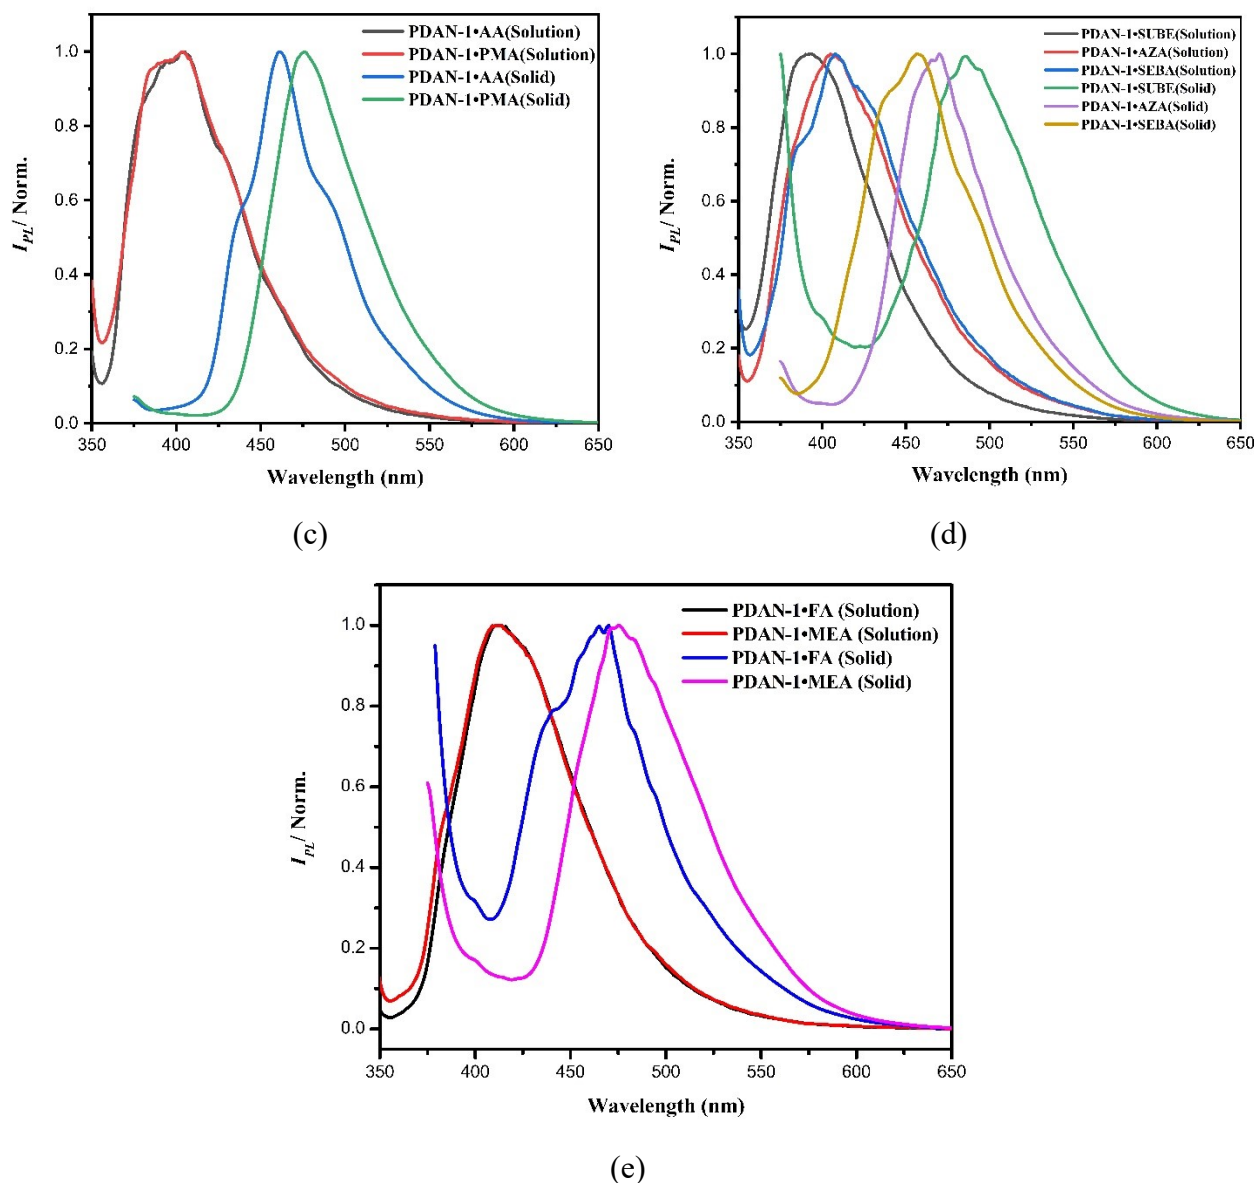

**Figure S25.** Solution and solid-state fluorescence spectra of (a) **PDAN-1•OA** and **PDAN-1•MA**; (b) **PDAN-1•SA** and **PDAN-1•GA**; (c) **PDAN-1•AA** and **PDAN-1•PMA**; (d) **PDAN-1•SUBE**, **PDAN-1•AZA** and **PDAN-1•SEBA**; and (e) **PDAN-1•MEA** and **PDAN-1•FA** at an excitation wavelength of 365 nm.

The alternation of solid-state fluorescence of **PDAN-1** diacids based on odd-even parity can be better represented by CIE chromaticity diagram that shows two different regions of color for the odd and even diacid cocrystals of **PDAN-1** (Figure S26).

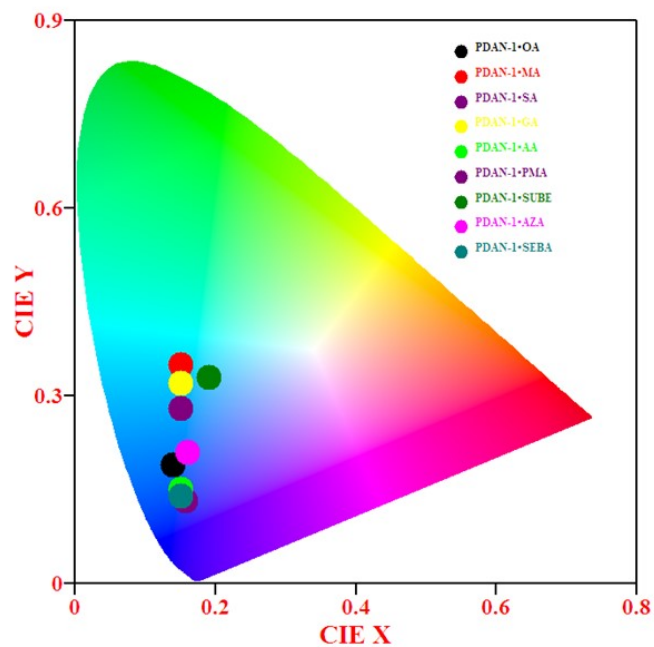

**Figure S26.** CIE chromaticity diagram for **PDAN-1•diacid** cocrystals.

## 9. Photoluminescence (PL) decay study

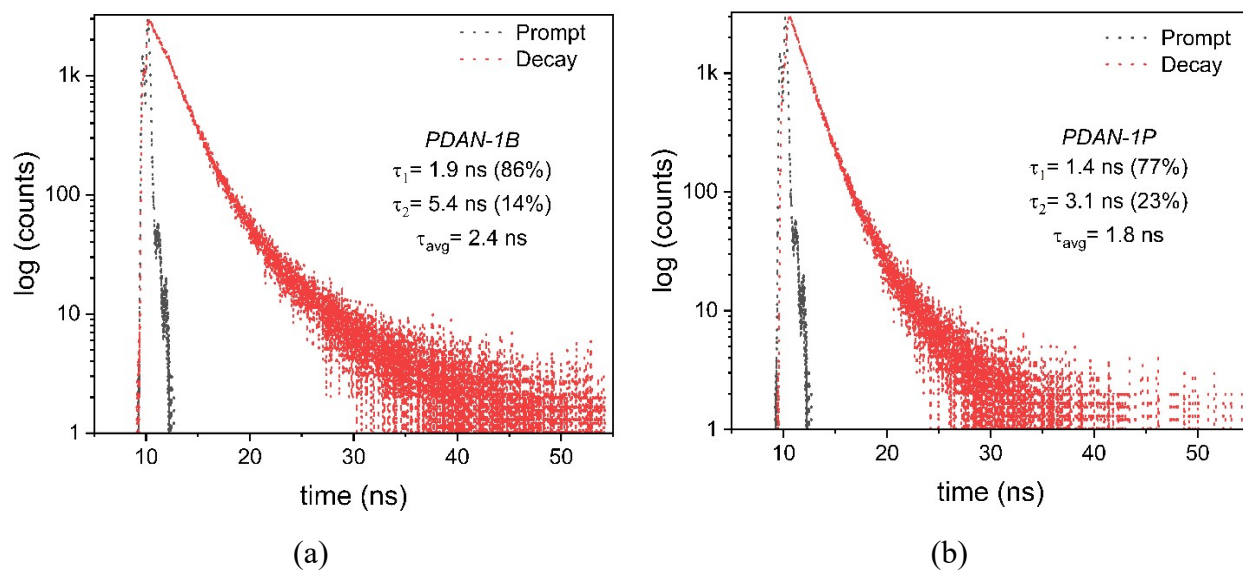

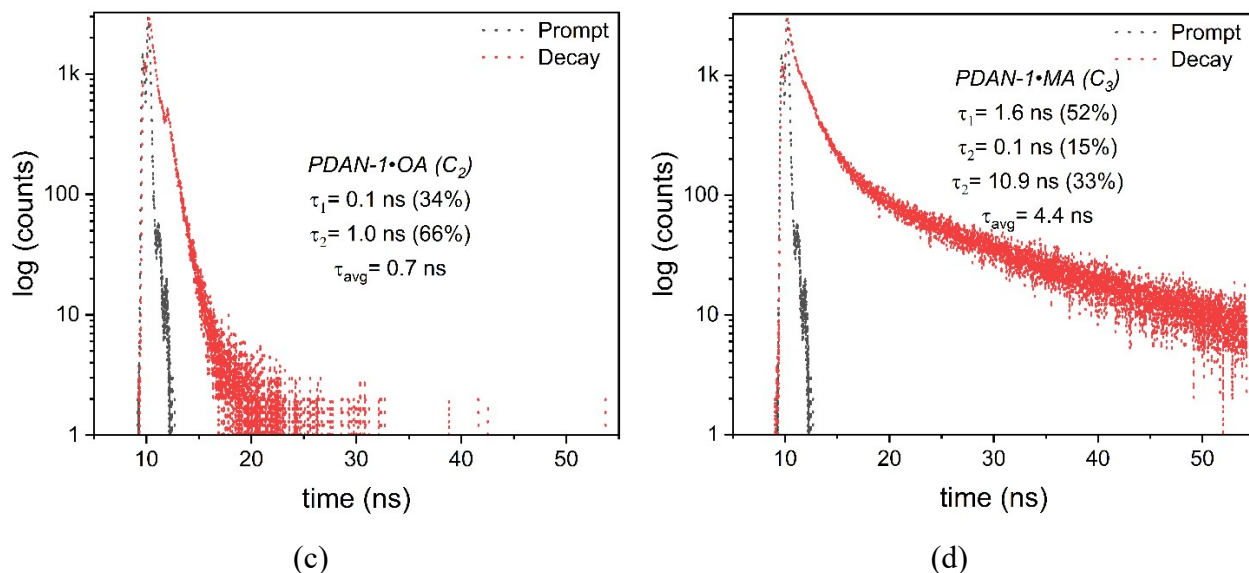

**Figure S27.** Lifetime decay profile of (a) **PDAN-1B**, (b) **PDAN-1P**, (c) **PDAN-1•OA** and (d) **PDAN-1•MA** respectively. All the samples were excited using a 371 nm LASER. Emissions were collected at the respective emission maximum.

## 10. Aggregation Induced Titration

To investigate the AIE behaviour of the synthesized cocrystals, we performed aggregation induced titration for all the cocrystals in ethanol-hexane solvent system. In case of all the cocrystals, it is observed that the fluorescence intensity of the mixture gradually increases with the increase in percentage of hexane but not to a significant extent (Figure S27-35).

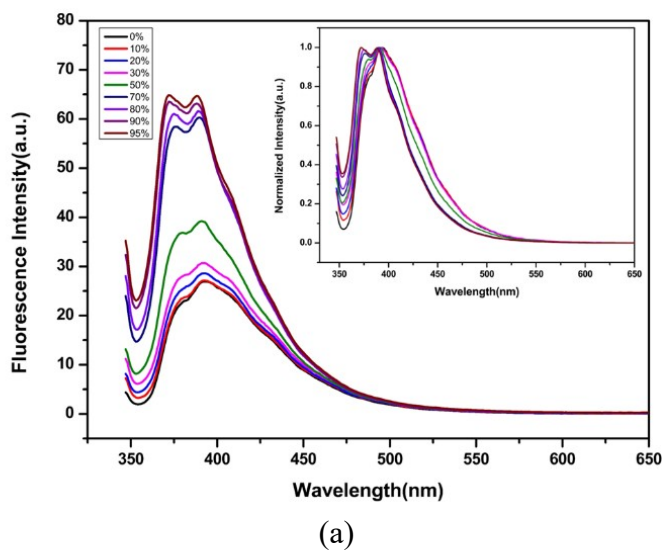

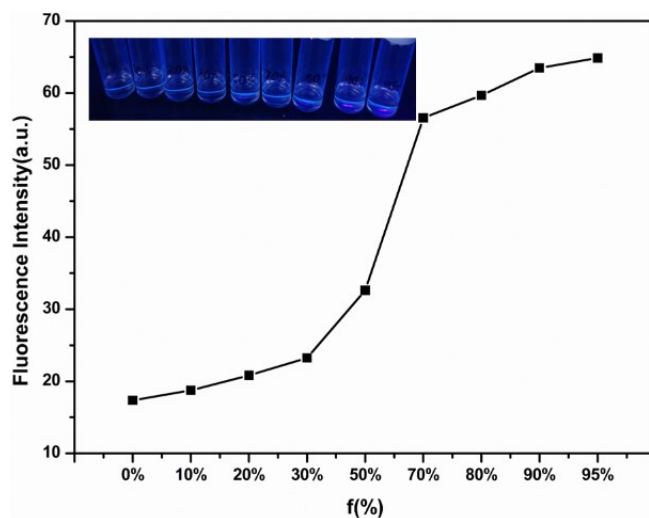

(b)

**Figure S28.** Fluorescence spectra of the **PDAN-1•OA** in ethanol–hexane with different hexane percentage (%) at an exciting wavelength 337 nm (b) Plot of fluorescence intensity at 372.06 nm with the varying percentage of hexane (%).

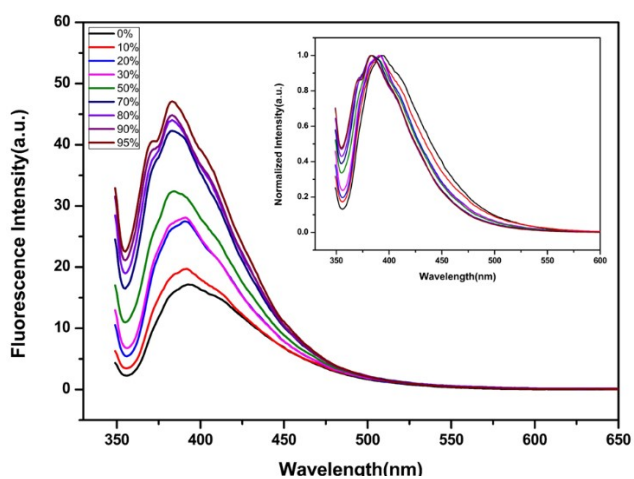

(a)

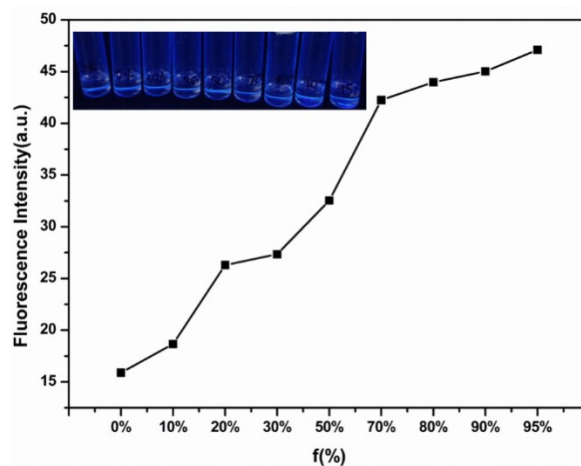

(b)

**Figure S29.** (a) Fluorescence spectra of the **PDAN-1•MA** in ethanol–hexane with different hexane percentage (%) at an exciting wavelength 339 nm (b) Plot of fluorescence intensity at 382.96 nm with the varying percentage of hexane (%).

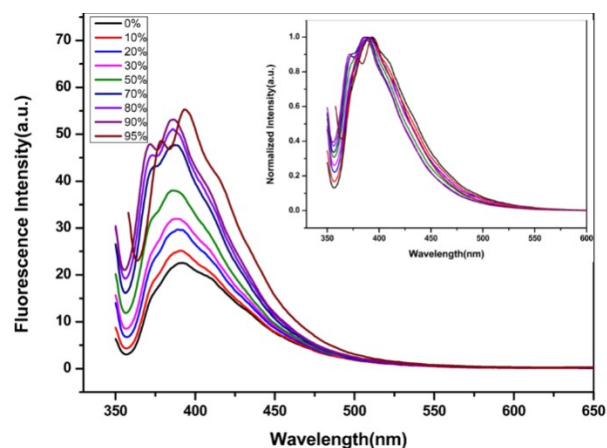

(a)

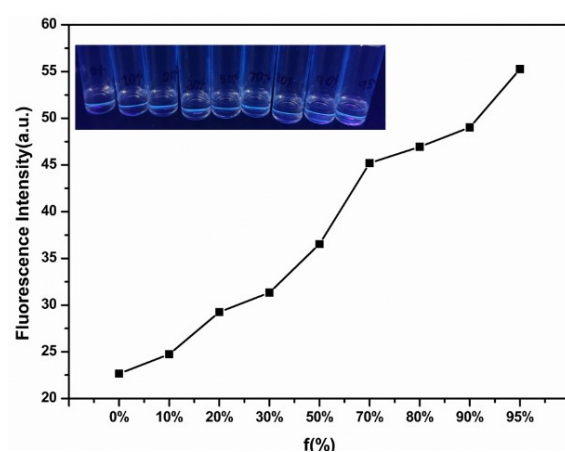

(b)

**Figure S30.** (a) Fluorescence spectra of the **PDAN-1•SA** in ethanol–hexane with different hexane percentage (%) at an exciting wavelength 340 nm (b) Plot of fluorescence intensity at 393.59 nm with the varying percentage of hexane (%).

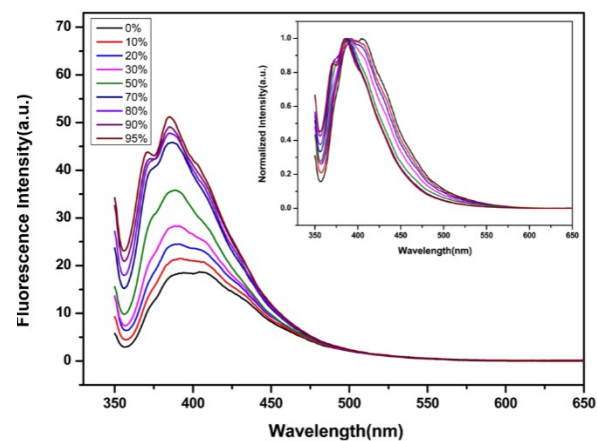

(a)

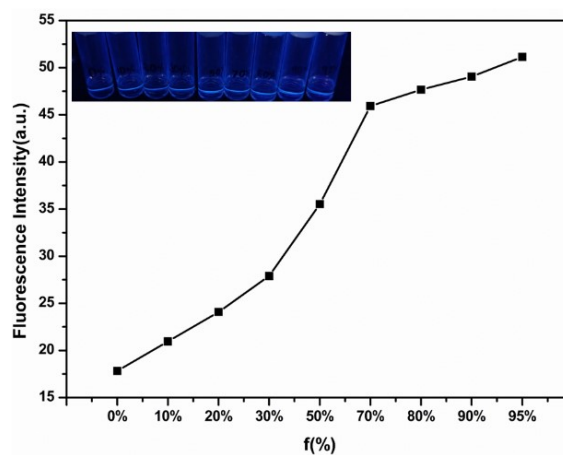

(b)

**Figure S31.** (a) Fluorescence spectra of the **PDAN-1•GA** in ethanol–hexane with different hexane percentage (%) at an exciting wavelength 340 nm (b) Plot of fluorescence intensity at 385.17 nm with the varying percentage of hexane (%).

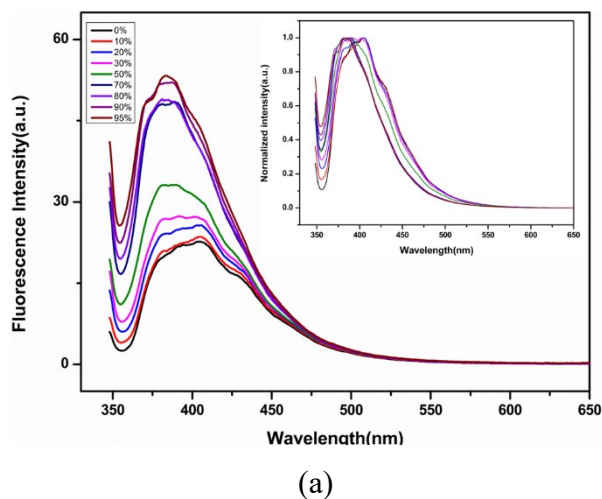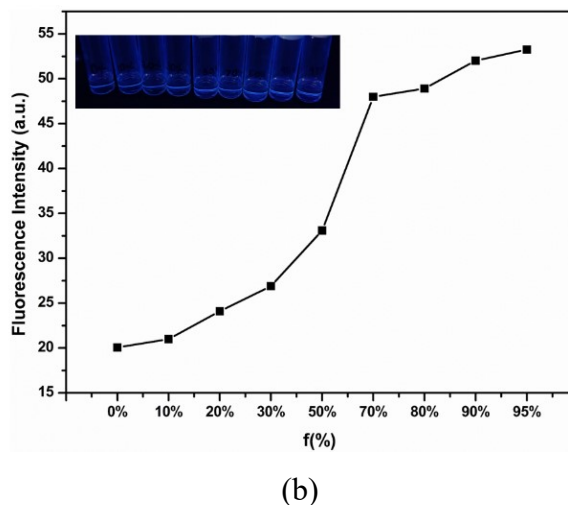

**Figure S32.** (a) Fluorescence spectra of the **PDAN-1•AA** in ethanol–hexane with different hexane percentage (%) at an exciting wavelength 337 nm (b) Plot of fluorescence intensity at 383.76 nm with the varying percentage of hexane (%).

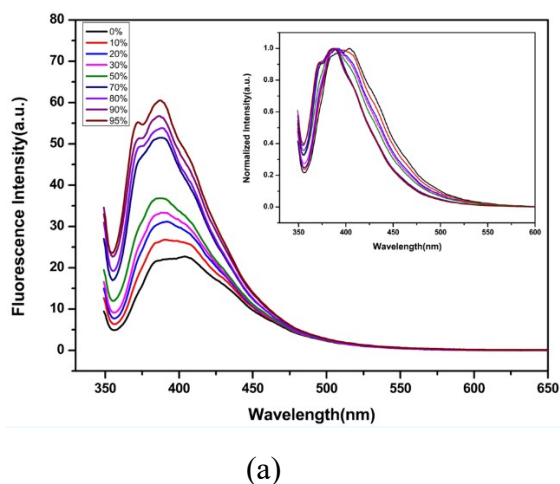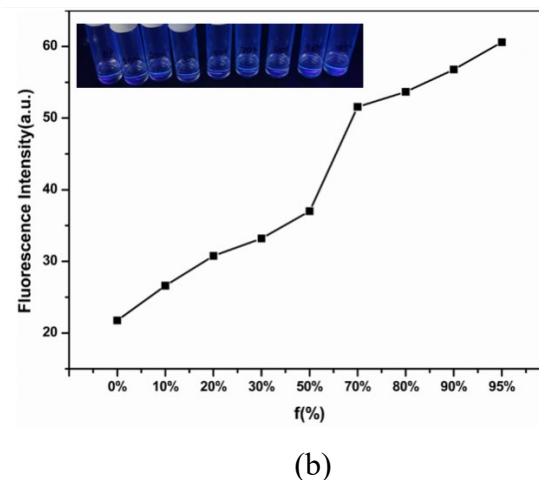

**Figure S33.** (a) Fluorescence spectra of the **PDAN-1•PA** in ethanol–hexane with different hexane percentage (%) at an exciting wavelength 339 nm (b) Plot of fluorescence intensity at 387.11 nm with the varying percentage of hexane (%).

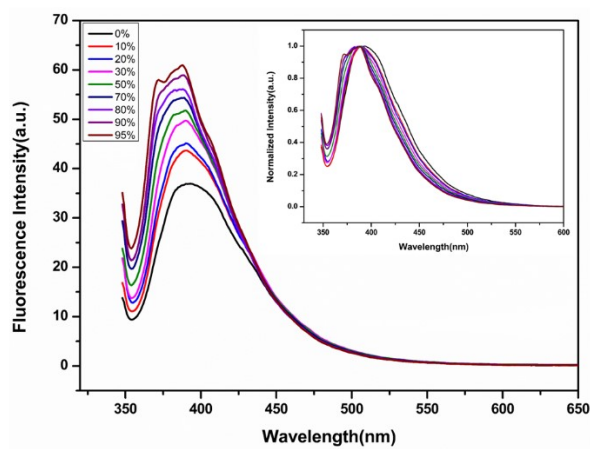

(a)

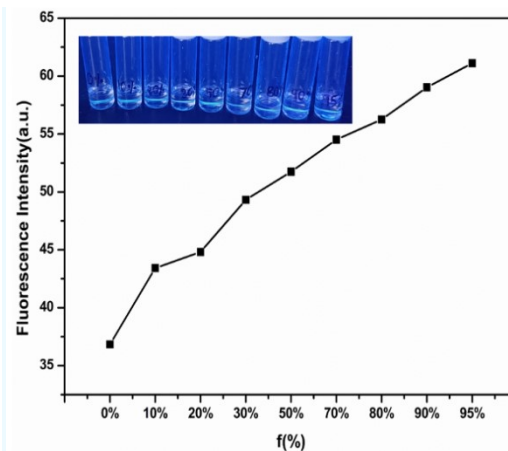

(b)

**Figure S34.** (a) Fluorescence spectra of the **PDAN-1•SUBE** in ethanol–hexane with different hexane percentage (%) at an exciting wavelength 338 nm (b) Plot of fluorescence intensity at 387.91 nm with the varying percentage of hexane (%).

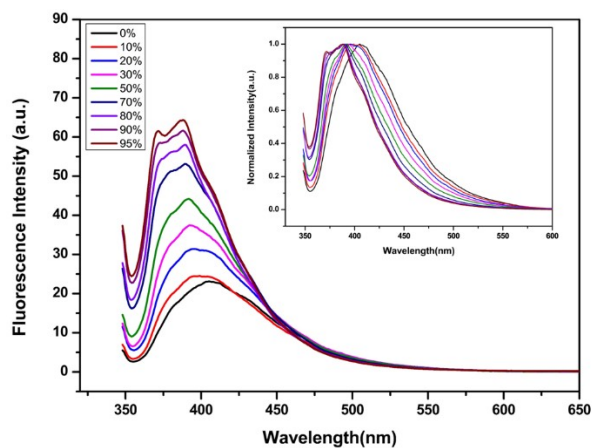

(a)

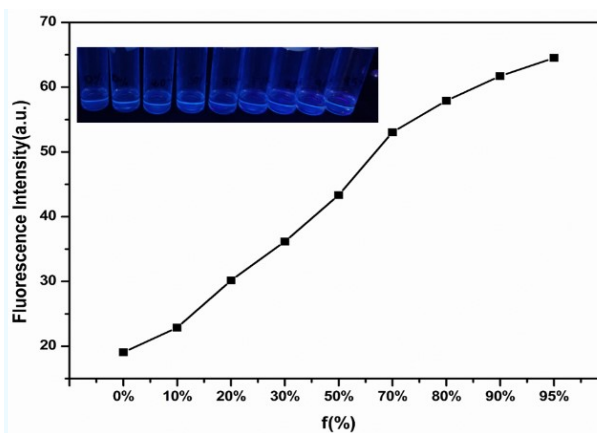

(b)

**Figure S35.** (a) Fluorescence spectra of the **PDAN-1•AZA** in ethanol–hexane with different hexane percentage (%) at an exciting wavelength 338 nm (b) Plot of fluorescence intensity at 388.20 nm with the varying percentage of hexane (%).

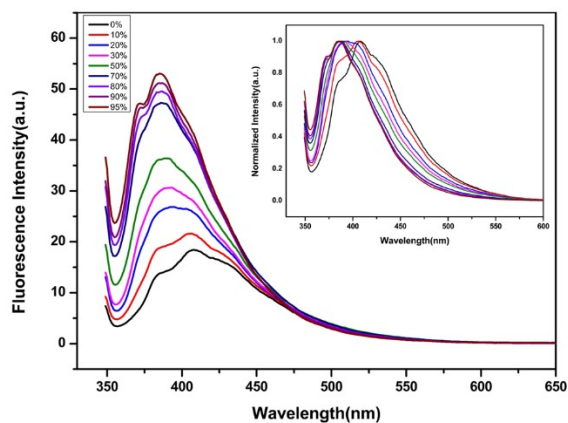

(a)

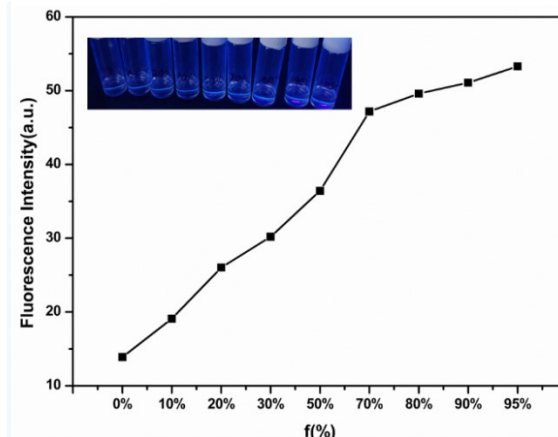

(b)

**Figure S36.** (a) Fluorescence spectra of the **PDAN-1•SEBA** in ethanol–hexane with different hexane percentage (%) at an exciting wavelength 339 nm (b) Plot of fluorescence intensity at 385.30 nm with the varying percentage of hexane (%).

## 11. DSC thermograms of PDAN-1 multicomponent solids

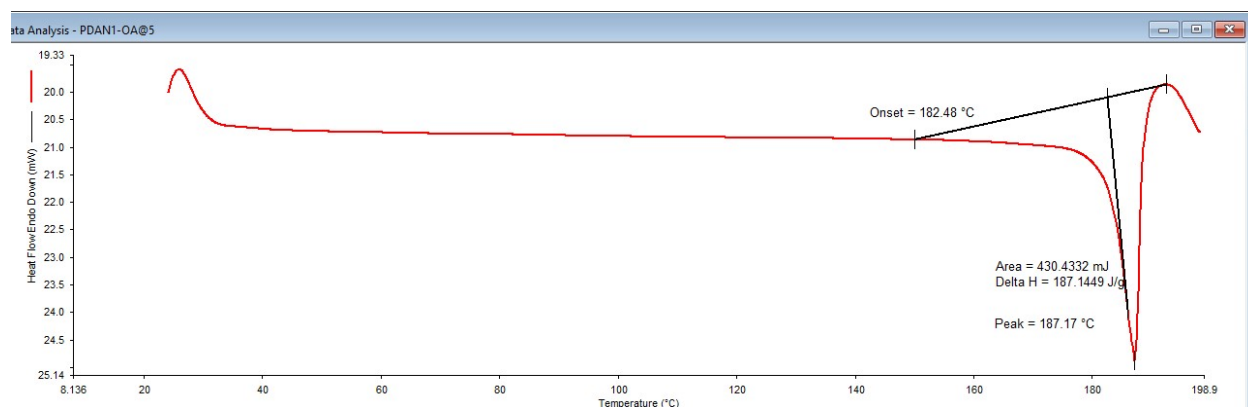

(a)

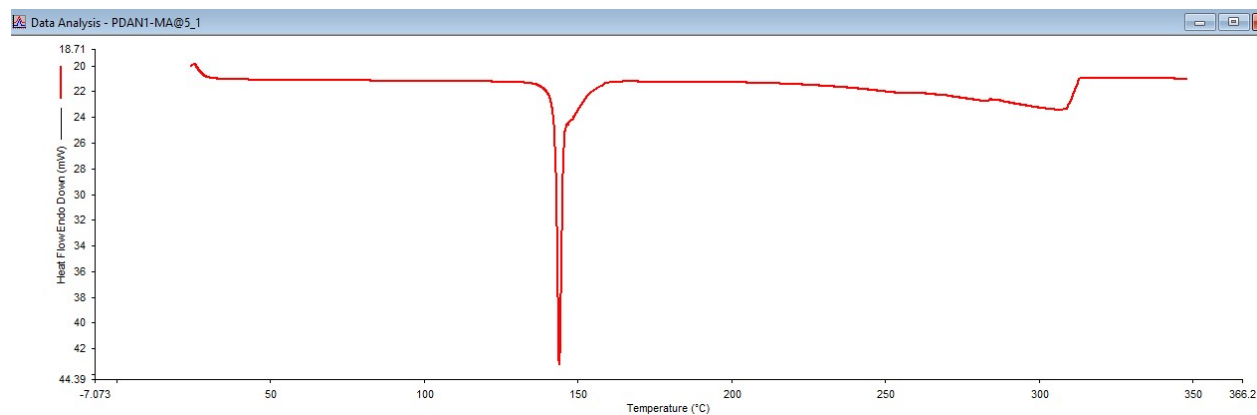

(b)

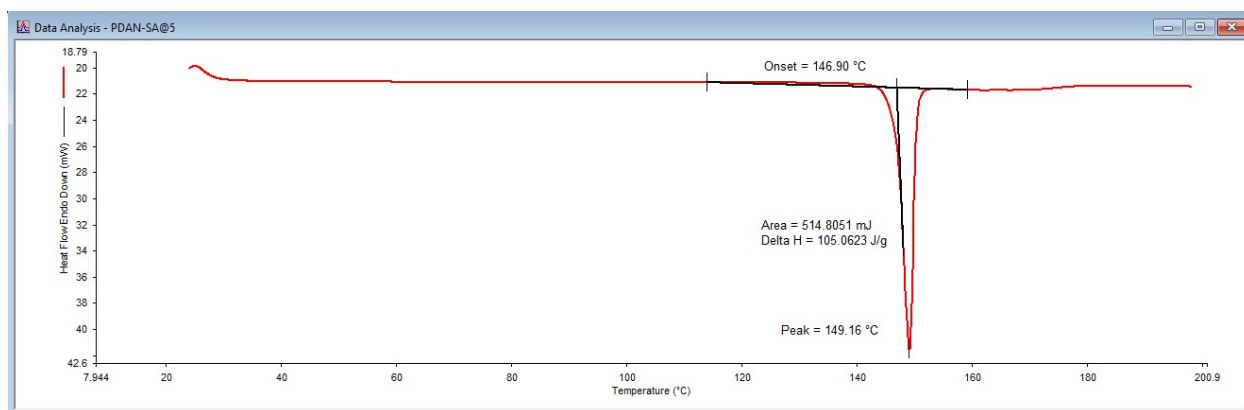

(c)

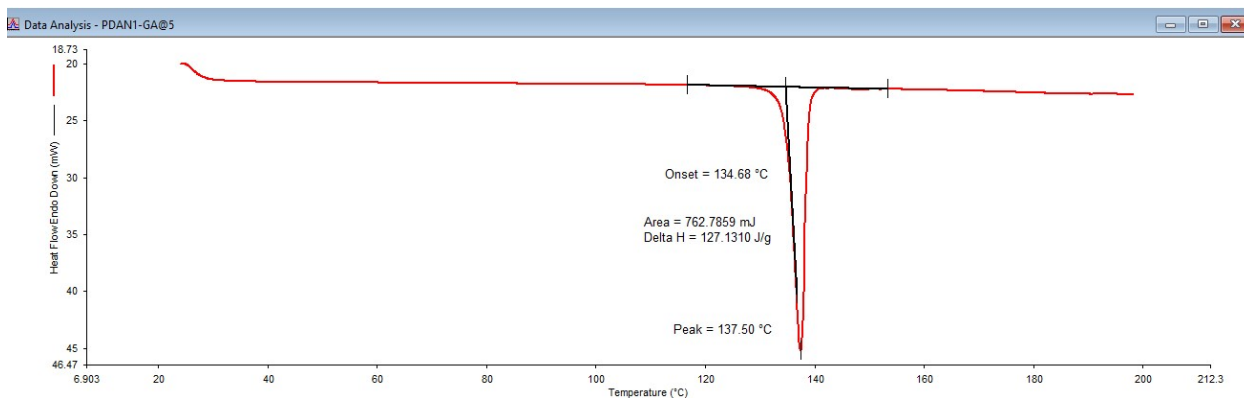

(d)

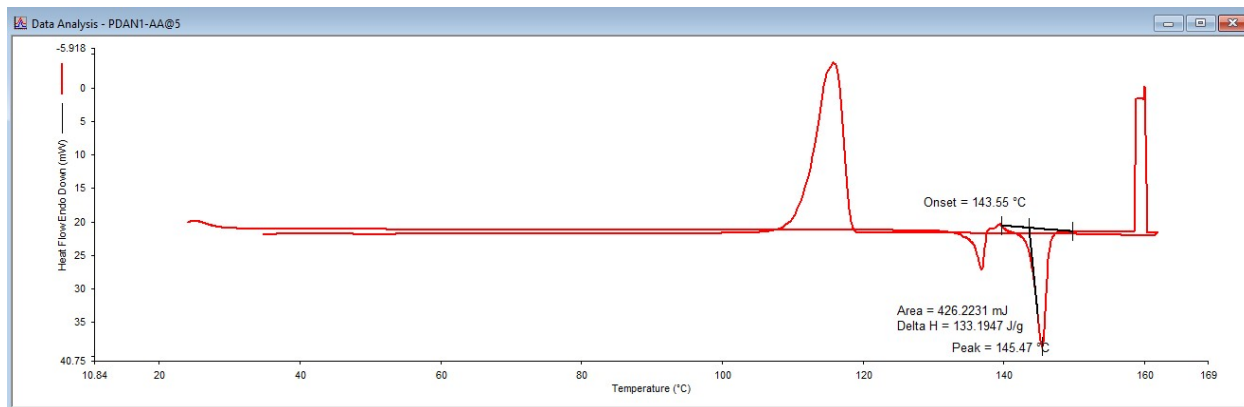

(e)

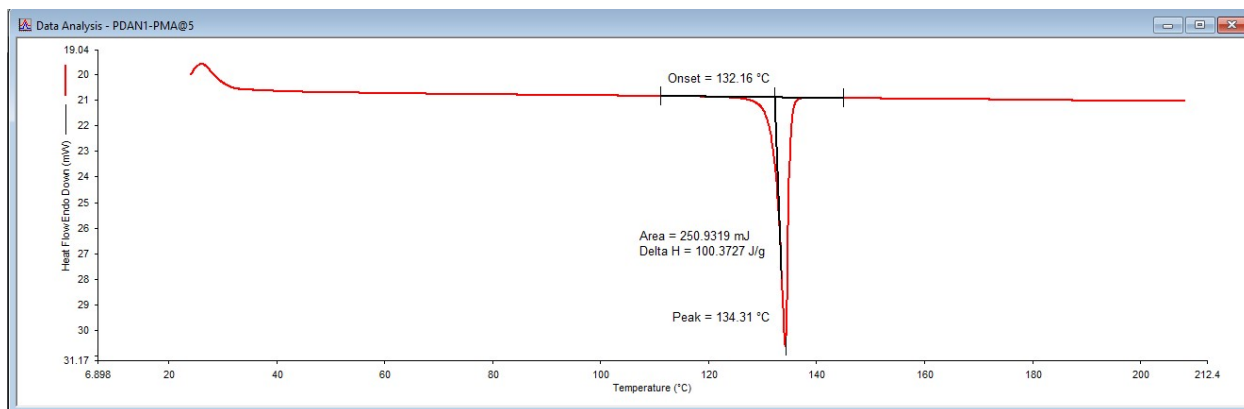

(f)

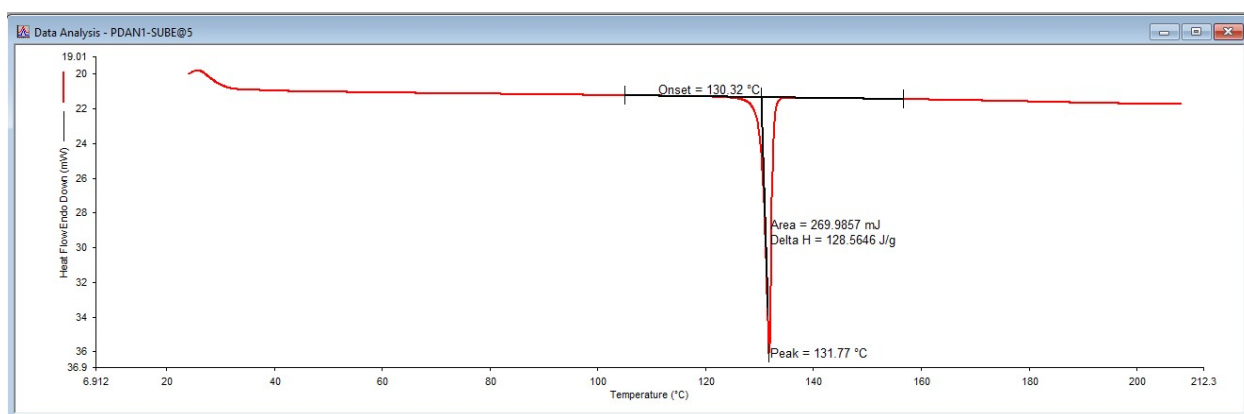

(g)

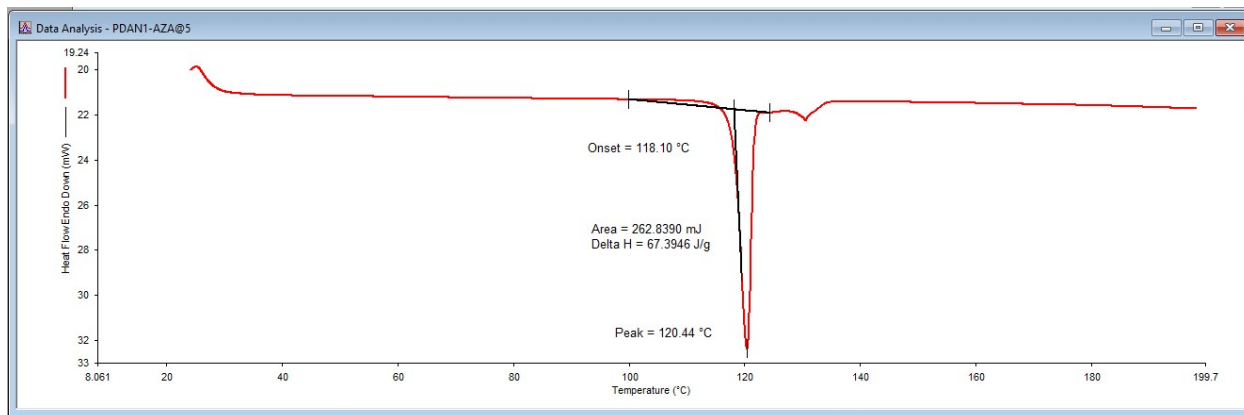

(h)

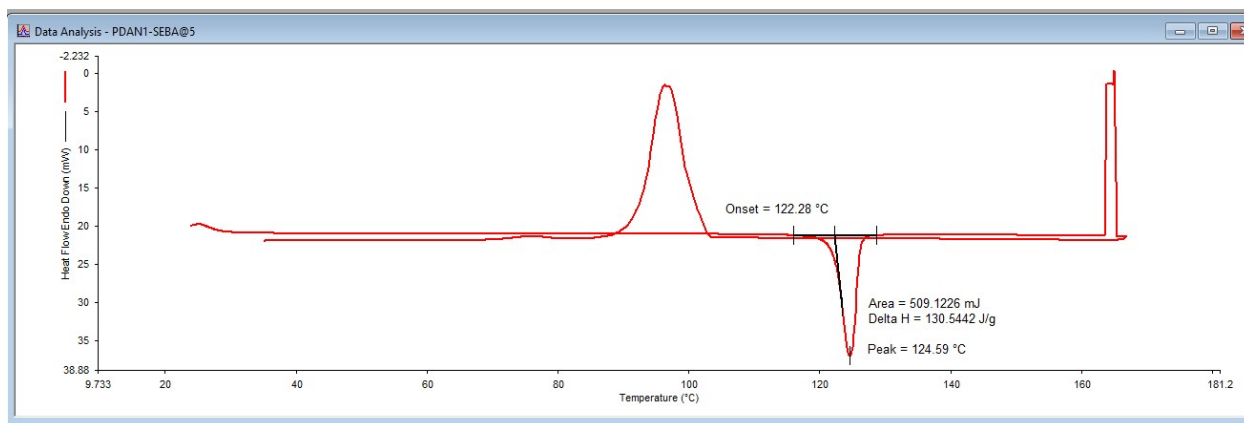

(i)

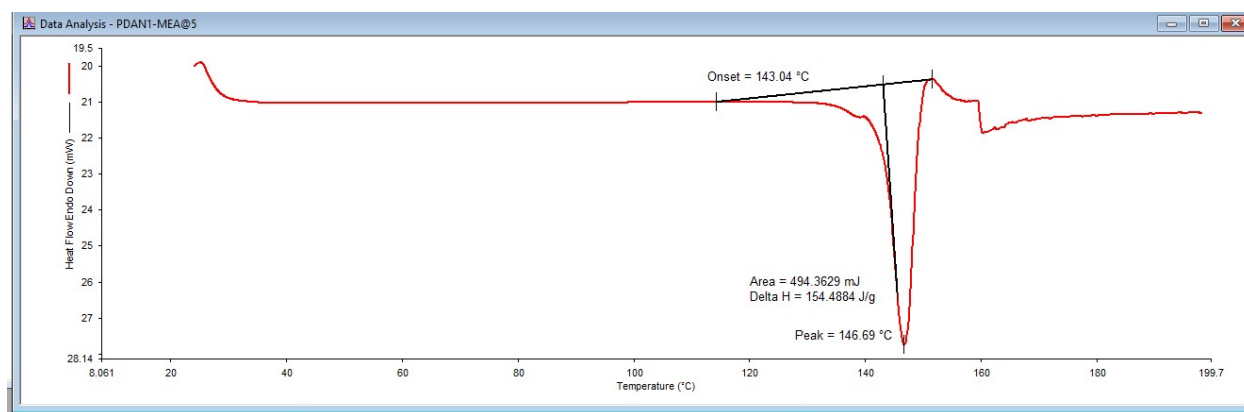

(j)

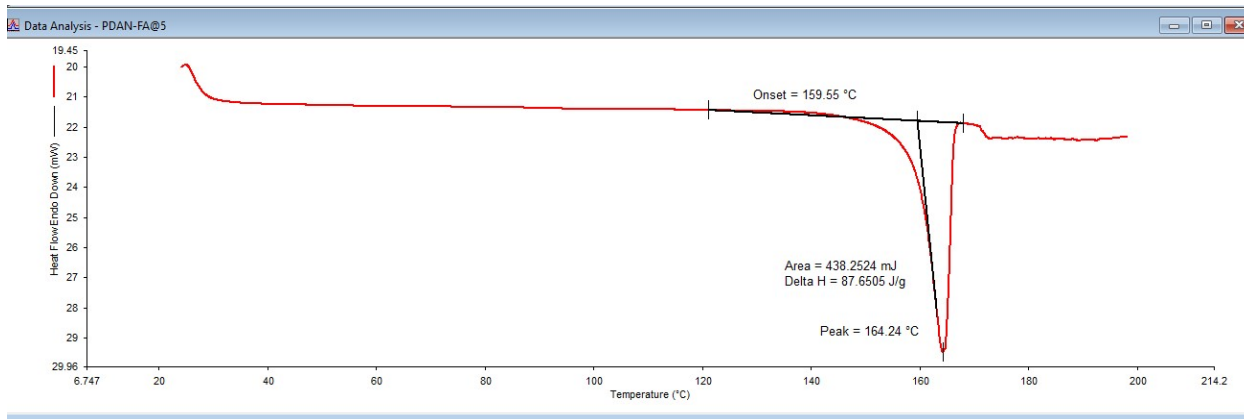

(k)

**Figure S37.** DSC thermogram of **PDAN-1P** multi-component solids with coformers (a) OA, (b) MA, (c) SA, (d) GA, (e) AA, (f) PMA, (g) SUBE, (h) AZA, (i) SEBA, (j) MEA and (k) FA.

## 12. Nanomechanical analysis

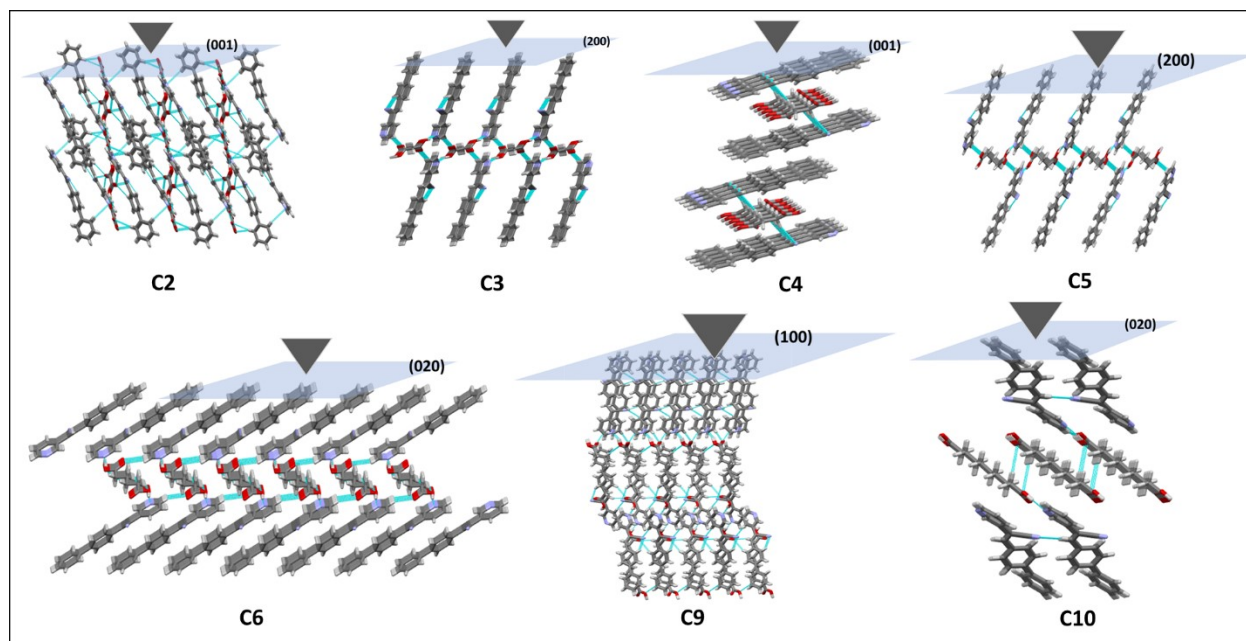

**Figure S38.** Schematic of nanoindentation on the major faces of **PDAN-1** multi-component solids with all the aliphatic dicarboxylic acid coformers used in the study derived from BFDH morphology.

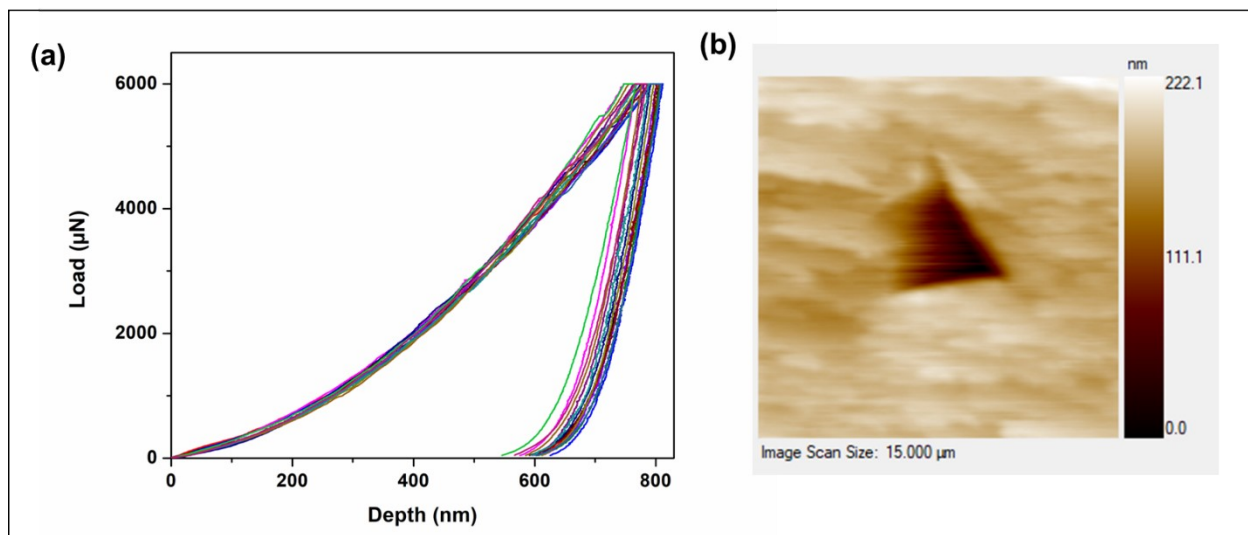

**Figure S39.** (a) Representative load-depth ( $P$ - $h$ ) curves obtained using peak load of 6 mN on major face of **PDAN-1•OA** salt cocrystal. (b) 2D representation of the scanning probe microscopic (SPM) image of the residual indent impression. The reduced modulus obtained is  $15.32 \pm 1.02$  GPa.

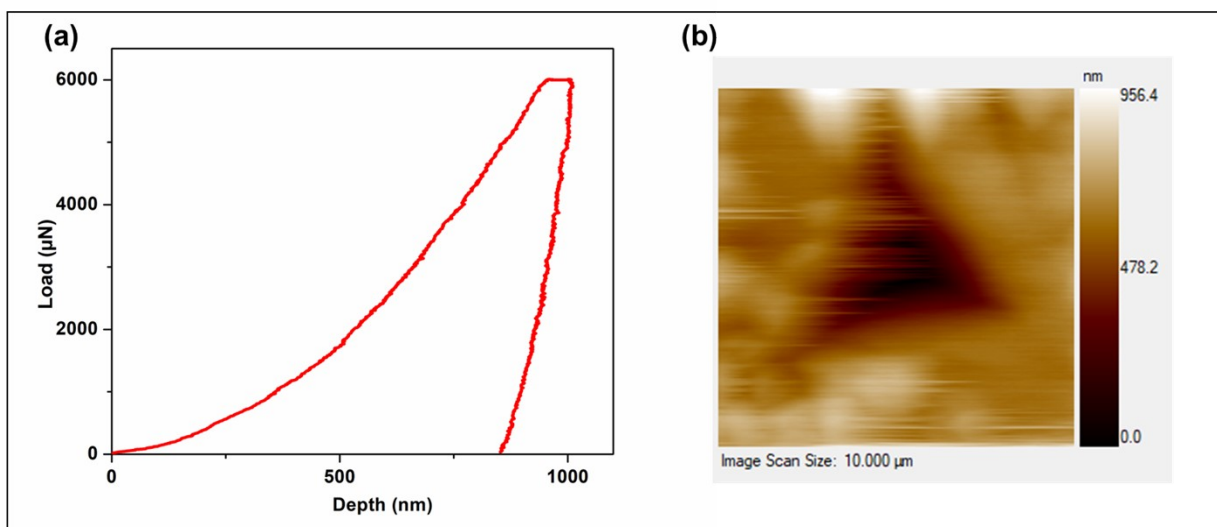

**Figure S40.** (a) Representative load-depth ( $P$ - $h$ ) curves obtained using peak load of 6 mN on major face of **PDAN-1•MA** cocrystal. (b) 2D representation of the scanning probe microscopic (SPM) image of the residual indent impression. The reduced modulus obtained is  $11.78 \pm 2.97$  GPa.

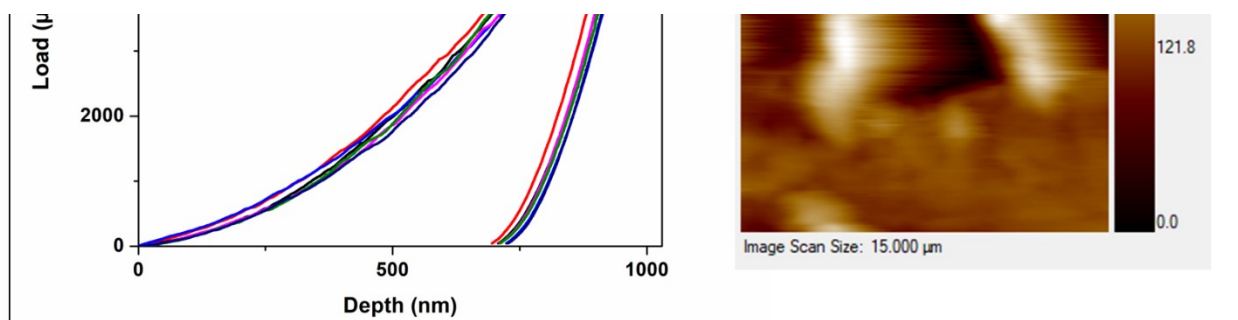

**Figure S41.** (a) Representative load-depth ( $P$ - $h$ ) curves obtained using peak load of 6 mN on major face of **PDAN-1•SA** cocrystal. (b) 2D representation of the scanning probe microscopic (SPM) image of the residual indent impression. The reduced modulus obtained is  $7.82 \pm 0.17$  GPa.

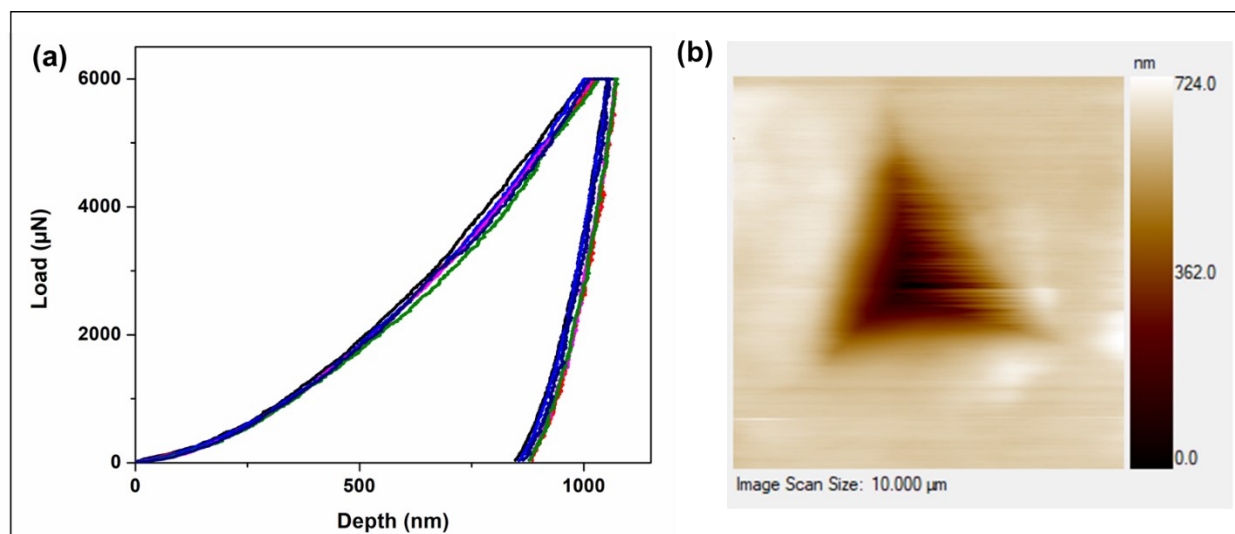

**Figure S42.** (a) Representative load-depth ( $P$ - $h$ ) curves obtained using peak load of 6 mN on major face of **PDAN-1•GA** cocrystal. (b) 2D representation of the scanning probe microscopic (SPM) image of the residual indent impression. The reduced modulus obtained is  $9.13 \pm 0.24$  GPa.

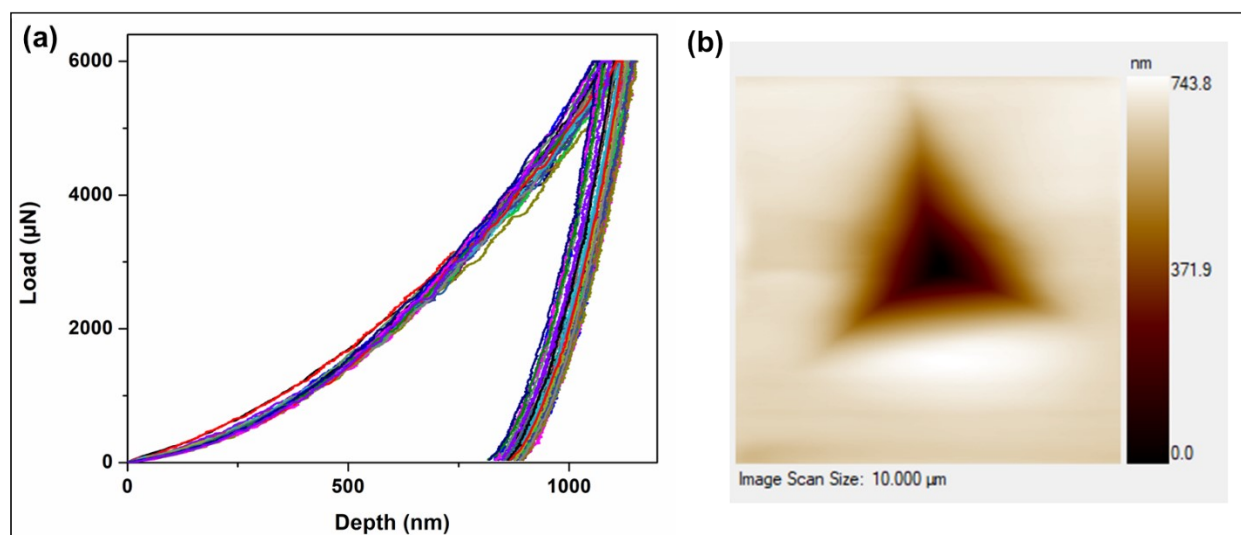

**Figure S43.** (a) Representative load-depth ( $P$ - $h$ ) curves obtained using peak load of 6 mN on major face of **PDAN-1•AA** cocrystal. (b) 2D representation of the scanning probe microscopic (SPM) image of the residual indent impression. The reduced modulus obtained is  $6.86 \pm 0.55$  GPa.

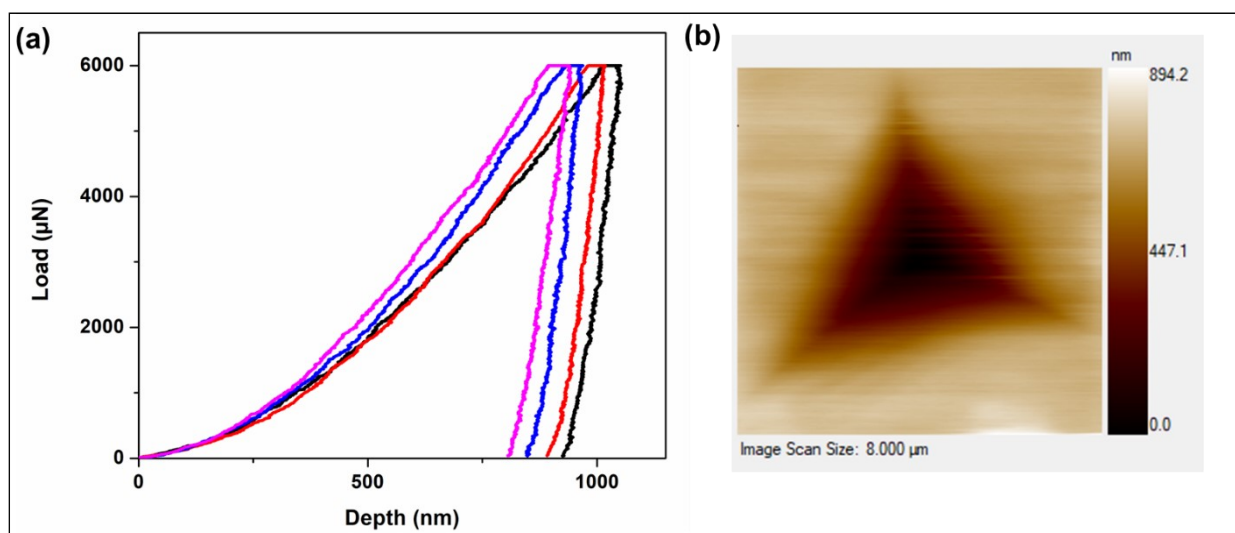

**Figure S44.** (a) Representative load-depth ( $P$ - $h$ ) curves obtained using peak load of 6 mN on major face of **PDAN-1•AZA** cocrystal. (b) 2D representation of the scanning probe microscopic (SPM) image of the residual indent impression. The reduced modulus obtained is  $13.07 \pm 1.20$  GPa.

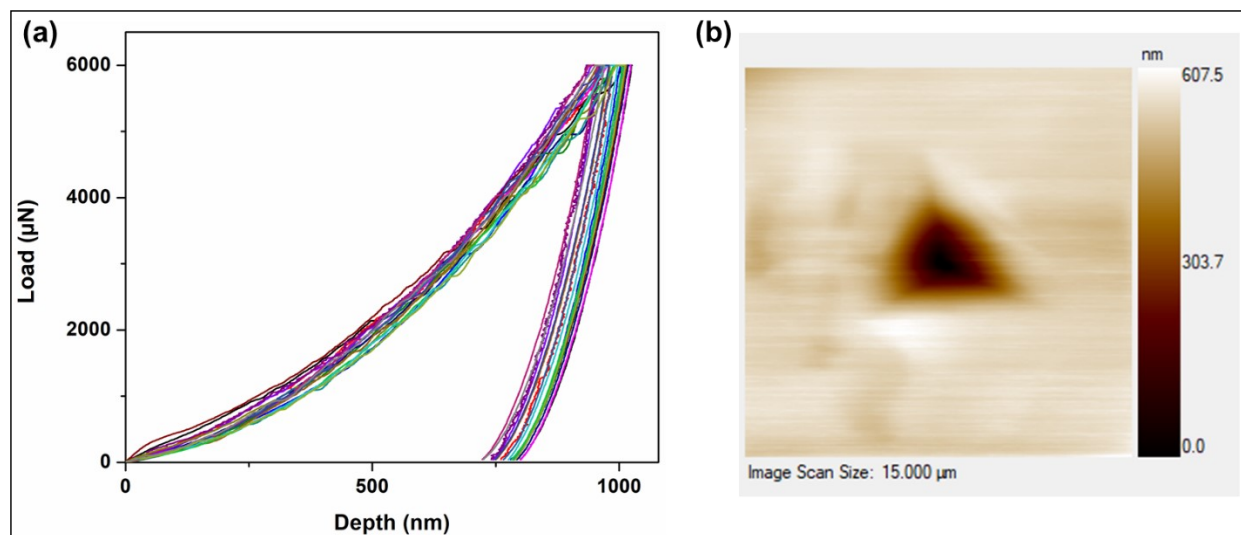

**Figure S45.** (a) Representative load-depth ( $P$ - $h$ ) curves obtained using peak load of 6 mN on major face of **PDAN-1•SEBA** cocrystal. (b) 2D representation of the scanning probe microscopic (SPM) image of the residual indent impression. The reduced modulus obtained is  $8.59 \pm 0.34$  GPa.
